# Supplementary material for: Epigenetic modifications acetylation and deacetylation play important roles in juvenile hormone action
Source: BMC Genomics. 2018 Dec 14;19:934. doi: 10.1186/s12864-018-5323-4 (PMC6295036; doi:10.1186/s12864-018-5323-4)
Supplement: Supplementary file 3 — Excel S2. Excel sheet containing details of 699 genes induced by TSA (MD vs. MT) and their relative expression in other treatments of interest such as MD vs. CD and MD vs. CT. Genes with epifactor domains showed separately in a second excel sheet. Expression of Met and SRC in all three treatments showed in another excel sheet. (XLSX 133 kb) [file 12864_2018_5323_MOESM3_ESM.xlsx]

## Sheet: TSA induction
		Comparisons	MD vs CD		MD vs CT		MD vs MT
Gene	Gene_Ids	Description	Pvalue	fold change	Pvalue	fold change	Pvalue	fold change
Cpap1-h	TcasGA2_TC009894	cuticular protein analogous to peritrophins 1-H	0.00545	-9.69744	0.233303	-2.36831	0.0006739	9.16501
Kr-h1	TcasGA2_TC012990	Kruppel-homolog 1	0.0935542	-2.31128	0.896973	-1.11665	0.0162433	2.34068
LOC100141540	TcasGA2_TC032378	uncharacterized LOC100141540	0.0225857	1.43652	0.665803	-1.10537	4.754e-12	4.54188
LOC100141546	TcasGA2_TC002408	protein-methionine sulfoxide oxidase Mical	0.268094	1.17407	0.389327	-1.22913	1.574e-07	2.97956
LOC100141585	TcasGA2_TC030754	sushi	1.08e-05	-1.89046	0.0166213	-1.8135	0.000368	2.0905
LOC100141638	TcasGA2_TC013009	protein outspread	0.909071	-1.01678	0.12305	-1.44277	1.29e-13	4.77244
LOC100141683	TcasGA2_TC002185	uncharacterized LOC100141683	0.48195	-1.15755	0.976552	-1.00687	3.315e-20	10.1261
LOC100141693	TcasGA2_TC007950	uncharacterized LOC100141693	0.0105326	-1.42566	0.0974083	-1.49001	1.288e-05	2.44827
LOC100141810	TcasGA2_TC008959	hypothetical protein	0.0656782	1.34244	0.994588	1.00185	4.959e-06	2.81735
LOC100141824	TcasGA2_TC003429	Krn	0.662284	-1.09203	0.0102553	-2.07262	0.000222	2.417
LOC100141833	TcasGA2_TC014502	uncharacterized LOC100141833	2.05e-14	-7.76399	7.976e-08	-4.77886	6.743e-09	3.91044
LOC100141846	TcasGA2_TC013676	protein phosphatase 1 regulatory subunit 11	0.883518	-1.02318	0.299619	-1.30818	0.0006968	2.14962
LOC100141852	TcasGA2_TC014802	tectonin beta-propeller repeat-containing protein	0.0546138	1.31342	0.740744	-1.09765	0.0003072	2.33316
LOC100141870	TcasGA2_TC007806	location of vulva defective 1	0.982752	1.00332	0.471646	1.19404	0.0003867	2.13513
LOC100141888	TcasGA2_TC014223	phosphatidylinositol 3-kinase regulatory subunit alpha	0.563868	-1.09078	0.151238	-1.47838	0.001829	2.04597
LOC100141931	NA	zinc finger protein 271-like	0.0118514	1.53358	0.972795	1.01063	0.007045	2.17864
LOC100141973	TcasGA2_TC014496	uncharacterized LOC100141973	0.0552547	1.32807	0.744243	-1.09822	0.0001302	2.5163
LOC100141983	TcasGA2_TC012658	uncharacterized LOC100141983	0.0349681	1.3999	0.681518	-1.11577	0.0002586	2.30674
LOC100141998	TcasGA2_TC030885	nucleolar transcription factor 1-like	0.596993	1.07981	0.648471	-1.11627	8.843e-06	2.57463
LOC100142007	TcasGA2_TC003611	Krueppel-like factor 6	0.00523	-1.85209	7.548e-06	-4.44421	9.293e-07	3.8186
LOC100142011	TcasGA2_TC034251	kelch-like protein 38	0.0444655	1.54659	0.5279	-1.23895	0.007542	2.53559
LOC100142030	TcasGA2_TC008137	titin	0.660346	-1.06931	0.0138461	-1.8508	6.7e-13	4.91403
LOC100142060	TcasGA2_TC013011	mei-9	0.451222	-1.17105	0.241086	-1.3469	7.798e-11	4.23424
LOC100142062	TcasGA2_TC013016	Golgi apparatus protein 1	0.669946	1.06052	0.748456	-1.084	1.605e-06	2.79411
LOC100142155	TcasGA2_TC014629	uncharacterized LOC100142155	0.159647	1.24567	0.725163	-1.08901	0.000166	2.27052
LOC100142202	TcasGA2_TC014790	alsin	0.541181	1.10532	0.523226	1.18238	0.001074	2.11097
LOC100142209	TcasGA2_TC012344	protein sidekick	0.367289	-1.1379	0.001322	-2.15452	1.494e-08	3.23982
LOC100142236	NA	solute carrier family 2	0.304834	16.1102	0.077922	-44.7963	0.001647	1290.32
LOC100142269	TcasGA2_TC011610	zinc finger protein 358	0.00529	-1.50829	0.642607	1.12375	0.0002699	2.16916
LOC100142303	TcasGA2_TC007464	uncharacterized LOC100142303	0.00978	-1.64349	0.58821	-1.15292	3.569e-10	4.29883
LOC100142345	NA	putative uncharacterized protein ART2	0.0429701	-1.40204	3.163e-06	-8.39275	5.828e-05	6.04854
LOC100142399	TcasGA2_TC009710	pre-mRNA-splicing factor 38A	0.523784	-1.10652	0.818718	1.06303	0.0004112	2.29299
LOC100142455	TcasGA2_TC015944	uncharacterized LOC100142455	0.364423	-1.20576	0.908369	-1.03476	0.0001192	2.72303
LOC100142491	TcasGA2_TC013145	Hr38	1.2e-12	-3.94281	0.0001686	-2.62181	4.679e-10	3.78245
LOC100142502	TcasGA2_TC000787	max-interacting protein 1	0.137701	-1.43944	0.0134358	-2.19968	5.947e-06	3.79731
LOC100142535	TcasGA2_TC014779	cationic amino acid transporter 2	0.546469	-1.15285	0.773795	1.10961	0.005282	2.73171
LOC100142574	TcasGA2_TC006279	fem	0.139502	1.24226	0.879098	1.03981	3.531e-05	2.45913
LOC100142575	TcasGA2_TC008051	uncharacterized LOC100142575	0.0297015	1.51605	0.94849	-1.02015	0.001211	2.46533
LOC100142586	TcasGA2_TC031474	kiinesin-12	0.0794307	21.1679	0.547104	-3.42619	0.003607	116.082
LOC100142605	TcasGA2_TC003960	ankyrin-3	0.0230494	2.68536	0.28158	-1.93877	0.0005094	8.08106
LOC100142621	TcasGA2_TC012372	uncharacterized LOC100142621	0.159507	-1.25494	0.50686	1.20223	0.000234	2.45084
LOC103312142	TcasGA2_TC004196	retrovirus-related Pol polyprotein from transposon 17.6	0.234717	1.21192	0.130926	-1.4922	0.000109	2.43734
LOC103312170	TcasGA2_TC001306	DNA ligase 1	0.451539	1.1701	0.855893	-1.05162	0.0001963	2.67474
LOC103312186	TcasGA2_TC001382	bif	0.301885	-1.21023	0.625995	-1.13859	0.0001165	2.42932
LOC103312187	TcasGA2_TC000158	polynucleotide 5'-hydroxyl-kinase NOL9	0.303946	1.17239	0.0759225	-1.67171	0.0002794	2.24257
LOC103312200	TcasGA2_TC001348	probable U3 small nucleolar RNA-associated protein 11	0.174022	1.2312	0.783392	1.07836	7.009e-05	2.4899
LOC103312208	TcasGA2_TC003213	uncharacterized LOC103312208	0.00283	1.53759	0.713247	1.08558	1.772e-16	5.61911
LOC103312232	TcasGA2_TC003157	uncharacterized LOC103312232	0.182562	55.2737	0.817928	-1.52497	0.002696	581.542
LOC103312306	TcasGA2_TC003489	early endosome antigen 1	0.793339	1.03796	0.0658877	-1.55694	9.094e-07	2.77951
LOC103312310	TcasGA2_TC003005	muscle M-line assembly protein unc-89	0.623676	1.073	0.288588	-1.29301	3.977e-08	3.11234
LOC103312396	TcasGA2_TC014829	uncharacterized LOC103312396	0.114822	-1.86235	0.665142	1.14827	1.386e-05	5.39453
LOC103312414	TcasGA2_TC003791	transcription factor Sox-10	0.821275	1.15128	0.174447	-2.5557	0.0001424	12.0187
LOC103312490	TcasGA2_TC016067	uncharacterized LOC103312490	0.000494	15.9282	0.332832	-6.11432	0.003013	32.8594
LOC103312538	TcasGA2_TC007786	pericentriolar material 1 protein	9.12e-05	1.83888	0.357659	1.25715	3.807e-10	4.0362
LOC103312676	TcasGA2_TC032817	uncharacterized LOC103312676	0.169468	1.2942	0.945133	1.01801	2.428e-07	3.37714
LOC103312684	TcasGA2_TC007358	putative oxidoreductase GLYR1 homolog	0.843948	-1.02963	0.0613761	-1.62447	7.39e-05	2.45289
LOC103312685	TcasGA2_TC007354	titin homolog	2.6e-06	-1.9976	0.128785	-1.44882	5.526e-08	3.10238
LOC103312699	TcasGA2_TC003627	protein bric-a-brac 1-like	0.231244	-1.26051	0.0522913	-1.91919	0.0003061	3.08981
LOC103312701	TcasGA2_TC007293	uncharacterized LOC103312701	0.767651	-1.13857	0.132097	-2.37367	0.004009	4.40754
LOC103312761	TcasGA2_TC007007	lamin-B receptor	0.0351222	31.8788	0.845142	-1.34087	0.001755	107.097
LOC103312777	TcasGA2_TC008283	uncharacterized LOC103312777	0.254711	1.68959	0.347756	-1.82117	0.001171	8.31533
LOC103312803	TcasGA2_TC002783	early growth response protein 1	0.0421085	-1.52356	0.004411	-2.25619	8.241e-06	2.88398
LOC103312832	TcasGA2_TC010590	hypothetical protein	0.009	-2.08029	0.641203	1.14097	2.327e-05	3.3444
LOC103312839	TcasGA2_TC008381	uncharacterized LOC103312839	0.0763659	1.60102	0.235585	-1.76212	0.002442	3.51513
LOC103312902	TcasGA2_TC013973	uncharacterized LOC103312902	0.789682	-1.05555	0.543768	-1.20298	0.0005777	2.64993
LOC103312988	TcasGA2_TC013698	zinc finger protein 665	0.453605	-1.25765	0.0823338	-1.9692	0.003686	3.07979
LOC103313040	TcasGA2_TC013588	uncharacterized LOC103313040	0.207872	-1.40882	0.634318	-1.14024	3.662e-19	9.72218
LOC103313066	TcasGA2_TC014352	hypothetical protein	0.474363	-3.41003	0.121797	-7.5465	0.0007225	34.1385
LOC103313190	TcasGA2_TC032605	zinc finger protein 2-like	0.0174276	1.7209	0.0915998	-1.76169	3.358e-06	4.27
LOC103313193	TcasGA2_TC002118	Krueppel-like factor 6	0.000338	-1.97256	1.13e-06	-3.93699	6.264e-07	3.09762
LOC103313219	NA	uncharacterized LOC103313219	0.0102116	210.606	0.87163	1.43594	0.007688	227.507
LOC103313281	TcasGA2_TC013089	transcription factor Adf-1	0.689224	1.09355	0.383395	1.29104	0.0002276	2.72903
LOC103313285	TcasGA2_TC016040	uncharacterized LOC103313285	0.256137	1.28288	0.751236	-1.11892	0.008387	2.52156
LOC103313416	TcasGA2_TC015656	OBP04	0.0157045	96.0122	0.985998	1.0465	0.009215	458.76
LOC103313424	TcasGA2_TC015016	band 4.1-like protein 5	0.208331	1.19381	0.46675	-1.18057	2.657e-08	3.12088
LOC103313464	TcasGA2_TC015820	gibberellin-regulated protein 14	0.963517	-1.00938	0.16155	-1.48827	8.311e-07	3.38653
LOC103313487	TcasGA2_TC004254	uncharacterized LOC103313487	0.126052	-1.40404	8.699e-06	-4.92135	2.529e-06	5.10276
LOC103313528	TcasGA2_TC009316	hypothetical protein	0.0632161	-2.8933	0.0365128	-5.35116	0.007784	4.65141
LOC103313573	TcasGA2_TC009100	uncharacterized LOC103313573	4.98e-11	2.40397	0.003248	-2.0671	6.934e-22	7.22965
LOC103313624	TcasGA2_TC033693	probable ATP-dependent RNA helicase DDX43	0.140263	1.22421	0.351021	-1.23124	0.0001408	2.12974
LOC103313626	TcasGA2_TC009800	uncharacterized LOC103313626	0.655854	-1.07135	0.479186	-1.18174	2.856e-07	2.91603
LOC103313636	TcasGA2_TC009019	uncharacterized LOC103313636	0.0598329	1.40676	0.674895	-1.11512	2.726e-10	4.44178
LOC103313671	TcasGA2_TC009885	trsn	0.166224	-1.43213	0.176251	-1.63939	0.00155	2.60396
LOC103313678	TcasGA2_TC008924	coiled-coil domain-containing protein 112	0.865839	1.34819	0.7842	1.47778	0.004621	39.0708
LOC103313679	TcasGA2_TC004176	late histone H1	0.487065	-1.72287	0.001625	-33.5036	1.229e-05	14.4739
LOC103313681	TcasGA2_TC009918	uncharacterized LOC103313681	0.159442	1.30566	0.0177828	-1.979	1.821e-08	3.925
LOC103313710	TcasGA2_TC030558	optic atrophy 3 protein homolog	0.362321	1.21489	0.335608	-1.38067	0.0003375	3.0309
LOC103313711	TcasGA2_TC033788	DET1- and DDB1-associated protein 1	0.945379	1.0203	0.480604	-1.26607	0.003415	3.02308
LOC103313725	TcasGA2_TC030677	E3 ubiquitin-protein ligase Topors	0.00128	1.63073	0.430528	1.21586	0.0008014	2.0681
LOC103313840	TcasGA2_TC033859	ataxin-10	0.86144	1.04653	0.98961	1.00526	0.001066	3.17728
LOC103313905	TcasGA2_TC009222	zinc finger protein 883	0.34923	1.27029	0.919909	1.03424	0.007162	2.7799
LOC103313906	TcasGA2_TC005888	zinc finger protein 513	0.346841	1.403	0.664589	-1.22269	0.001977	4.83232
LOC103313913	TcasGA2_TC006285	uncharacterized LOC103313913	0.0132365	1.45477	0.285897	-1.32532	1.138e-08	3.77903
LOC103313954	TcasGA2_TC005739	hypothetical protein	0.00195	1.64887	0.0203451	-1.8953	6.407e-05	2.46908
LOC103314011	TcasGA2_TC005560	uncharacterized LOC103314011	0.297748	1.34692	0.447835	-1.32287	0.001049	3.71444
LOC103314047	TcasGA2_TC005670	epidermal growth factor-like protein 8	0.00872	-3.35128	0.420673	-1.59015	0.003642	4.27202
LOC103314153	TcasGA2_TC006815	phosphatidylinositol N-acetylglucosaminyltransferase subunit Q	0.418102	1.25704	0.503687	-1.29746	0.0005681	3.69504
LOC103314184	TcasGA2_TC034252	endothelial lipase-like	0.594448	1.42756	0.249929	-4.37312	0.004718	10.2577
LOC103314255	TcasGA2_TC012510	uncharacterized LOC103314255	0.576878	2.75994	0.535565	-2.94909	0.008734	85.4897
LOC103314257	TcasGA2_TC012536	histone RNA hairpin-binding protein	0.944632	-1.01157	0.891564	-1.03481	0.000852	2.09952
LOC103314258	TcasGA2_TC012542	ubiquitin-like-conjugating enzyme ATG10	0.704222	-1.20402	0.0400011	-4.06307	0.003715	4.69825
LOC103314371	TcasGA2_TC011618	uncharacterized LOC103314371	0.239186	1.57707	0.248949	-2.01116	0.004757	4.72743
LOC103314492	TcasGA2_TC010361	THAP domain-containing protein 5-like	0.923171	1.02264	0.199522	-1.5554	0.009804	2.24982
LOC103314517	TcasGA2_TC001748	GPI ethanolamine phosphate transferase 1	0.000762	194.718	0.839977	-1.43221	0.001796	731.024
LOC103314523	TcasGA2_TC001694	uncharacterized LOC103314523	5.87e-07	2.12374	0.310595	1.28201	1.316e-05	2.58584
LOC103314582	TcasGA2_TC033928	gamma-tubulin complex component 6	0.420178	1.23469	0.989963	1.0037	0.001644	3.1417
LOC103314631	TcasGA2_TC010896	E3 ubiquitin-protein ligase BRE1A	0.983242	1.00383	0.749635	-1.09118	0.00232	2.01029
LOC103314681	TcasGA2_TC000090	hypothetical protein	0.0476389	1.35828	0.552046	1.18808	0.0006944	2.28948
LOC103314684	TcasGA2_TC000092	tRNA-splicing endonuclease subunit Sen34	0.985598	1.00546	0.573163	-1.29064	0.005132	3.09401
LOC103314828	TcasGA2_TC001565	zinc finger protein 391	0.00619	1.66961	0.515272	1.22225	0.005084	2.5252
LOC103314831	TcasGA2_TC001557	uncharacterized LOC103314831	0.271276	-1.30233	0.0790644	-1.63761	0.0005213	2.42285
LOC103314847	TcasGA2_TC015906	myb-like protein X	0.633735	-1.0804	0.178163	-1.41157	3.035e-08	3.42206
LOC103314871	TcasGA2_TC001617	uncharacterized LOC103314871	0.551199	1.20286	0.207783	-1.83791	0.004404	3.51378
LOC103314884	TcasGA2_TC011522	fatty acid synthase	0.399688	-1.12848	0.712049	1.08888	1.702e-26	10.1716
LOC103315023	TcasGA2_TC004531	XK-related protein 4	6.65e-11	3.59742	0.560637	1.1648	6.255e-06	3.37487
LOC103315031	TcasGA2_TC032013	lysine-specific histone demethylase 1A	0.446501	1.17525	0.0715014	-1.79368	3.506e-05	3.67636
LOC103315046	TcasGA2_TC004945	uncharacterized LOC103315046	3.03e-05	1.97332	0.0153048	-2.11526	2.561e-05	2.89046
LOC103315092	TcasGA2_TC001022	trans-Golgi network integral membrane protein 1	2.36e-06	2.1157	0.0164272	-1.91887	1.848e-07	3.44041
LOC103315131	TcasGA2_TC030619	neurogenic protein mastermind	0.781586	1.04141	0.314839	-1.26534	2.007e-05	2.43043
LOC103315182	TcasGA2_TC000673	hypothetical protein	0.345626	2.15183	0.175394	-8.67016	0.00485	15.8699
LOC103315202	TcasGA2_TC000479	uncharacterized LOC103315202	0.916742	-1.03673	0.607821	1.16866	9.694e-07	5.94375
LOC103315206	TcasGA2_TC032171	uncharacterized LOC103315206	0.000628	2.1472	0.883542	1.03996	1.207e-13	7.15319
LOC103315212	TcasGA2_TC000440	uncharacterized LOC103315212	2.14e-06	-5.77862	3.014e-05	-3.8227	6.726e-12	6.04026
LOC103315258	TcasGA2_TC001232	forkhead box protein N5	0.0969851	4.53845	0.910216	1.07992	0.0007052	28.4864
LOC107397511	NA	supervillin	0.00072	-1.61136	0.97036	-1.00952	0.001664	2.02962
LOC107397693	NA	golgin IMH1	0.540789	1.25514	0.720972	-1.12825	2.695e-06	7.13072
LOC107398768	NA	odorant receptor 2a-like	0.245567	39.7641	0.0403535	-504.747	0.006141	558.539
LOC107398788	NA	centrosome-associated zinc finger protein CP190	0.00355	2.01914	0.103006	-1.96362	0.005061	2.81196
LOC107398883	NA	uncharacterized LOC107398883	0.0194284	2.70216	0	-16.907	6.812e-13	26.8974
LOC107398888	TcasGA2_TC031589	zinc finger BED domain-containing protein 4-like	0.00666	2.18515	0.596018	-1.27515	0.002687	3.61851
LOC107399081	TcasGA2_TC030391	uncharacterized LOC107399081	0.144528	70.7835	0.008293	-1446.97	0.0007453	1604.47
LOC107399147	TcasGA2_TC031884	uncharacterized LOC107399147	0.0217606	2.47551	0.0728502	-4.08743	0.008731	5.01367
LOC107399155	NA	uncharacterized LOC107399155	5.33e-05	-2.06822	1.143e-05	-3.97488	0.001705	2.06189
LOC107399183	NA	uncharacterized LOC107399183	0.0614065	2.46228	0.298721	-3.21517	0.007631	6.99586
LOC652942	TcasGA2_TC010111	Ser	0.553576	-1.08923	0.0005028	-2.66272	7.974e-11	4.10698
LOC654915	TcasGA2_TC002636	neural cell adhesion molecule 2	0.29984	-1.2028	0.0690322	-1.59389	1.017e-06	2.89245
LOC654926	TcasGA2_TC013564	another transcription unit protein	0.354007	1.16523	0.483387	-1.21309	3.109e-05	2.65512
LOC654936	TcasGA2_TC015023	coiled-coil domain-containing protein 136	0.00863	-1.50699	0.0449816	-1.61215	3.536e-09	3.46358
LOC654972	TcasGA2_TC003025	ethanolamine-phosphate cytidylyltransferase	0.681775	-1.06739	0.275876	1.36611	5.222e-06	3.04158
LOC654984	TcasGA2_TC007101	protein goliath	5.3e-11	-4.40018	0.004352	-2.39373	0.003582	2.07788
LOC654996	TcasGA2_TC015439	calmodulin	7.03e-08	-2.38168	0.0403904	-1.71714	2.109e-07	3.18475
LOC655004	TcasGA2_TC006082	ski oncogene	0.465143	1.24785	0.0500498	-1.93834	5.063e-08	6.1208
LOC655012	TcasGA2_TC012462	mushroom body large-type Kenyon cell-specific protein 1	0.371268	-1.12903	0.745933	-1.07409	1.079e-05	2.36974
LOC655035	TcasGA2_TC000267	U3 small nucleolar RNA-associated protein 18 homolog	0.103813	1.32392	0.794467	1.07865	0.005066	2.06066
LOC655036	TcasGA2_TC001362	aminopeptidase N	0.000444	1.68818	0.734602	-1.08764	9.874e-05	2.33416
LOC655043	TcasGA2_TC003836	ADP-ribosylation factor-like protein 13B	0.795049	1.06262	0.126717	-1.60714	1.871e-07	3.88195
LOC655090	TcasGA2_TC004246	polycomb group protein Psc	0.120063	-1.36249	0.0017	-2.86507	0.003145	2.12956
LOC655103	TcasGA2_TC000263	epithelial discoidin domain-containing receptor 1	0.909757	1.20129	0.272072	-5.18295	0.00434	23.8876
LOC655106	TcasGA2_TC003397	protein retinal degeneration B	0.0180305	1.52182	0.137356	-1.86466	0.0003053	2.9764
LOC655127	TcasGA2_TC013340	5-aminolevulinate synthase	0.000531	1.7877	0.430513	1.2221	1.434e-09	4.25434
LOC655128	TcasGA2_TC014541	cysteine and histidine-rich protein 1	0.00208	1.74552	0.732279	1.08815	1.46e-14	5.67091
LOC655142	TcasGA2_TC006063	tight junction protein ZO-1	0.0967353	-1.3014	0.166434	-1.43541	0.0002661	2.35548
LOC655158	NA	exodeoxyribonuclease-like	0.584504	1.11663	0.002795	-2.35224	0.002454	2.12672
LOC655160	TcasGA2_TC001450	cysteine-rich hydrophobic domain-containing protein 2	0.104281	1.45345	0.923701	1.03152	0.001655	2.79802
LOC655170	TcasGA2_TC009513	CDC42 small effector protein homolog	0.37034	1.22832	0.735437	-1.11456	0.009988	2.3743
LOC655185	TcasGA2_TC003653	putative sodium-coupled neutral amino acid transporter 10	0.0506582	1.34036	0.644427	1.13184	0.0006555	2.13366
LOC655187	TcasGA2_TC002688	D-2-hydroxyglutarate dehydrogenase	0.619974	1.23396	0.278959	-2.08527	0.008318	4.41299
LOC655209	TcasGA2_TC015021	golgin subfamily A member 4	0.0391687	1.32099	0.725859	-1.09295	1.37e-06	2.80364
LOC655269	TcasGA2_TC007849	sortilin-related receptor	0.147227	1.22621	0.865586	1.04115	1.083e-06	2.79193
LOC655332	TcasGA2_TC011185	protein ENL	0.615062	1.08798	0.467121	1.23826	1.042e-10	4.98145
LOC655338	TcasGA2_TC001201	ER membrane protein complex subunit 2	0.186579	1.24315	0.390381	-1.27297	0.0004858	2.24341
LOC655340	TcasGA2_TC003149	drebrin-like protein	0.814049	-1.03542	0.965958	1.01045	1.008e-06	2.7458
LOC655355	TcasGA2_TC007507	breast cancer metastasis-suppressor 1-like protein	0.86377	1.03269	0.425828	1.2372	0.002664	2.12128
LOC655427	TcasGA2_TC002774	robo	0.495469	1.27409	0.179324	-1.98321	0.005607	3.7053
LOC655429	TcasGA2_TC002608	thyroid receptor-interacting protein 11	0.00103	1.68423	0.113409	-1.60224	6.34e-08	3.78686
LOC655467	TcasGA2_TC002190	protein winged eye	0.24256	1.1874	0.00198	-2.03656	3.545e-20	7.03525
LOC655493	TcasGA2_TC013253	UPF0568 protein C14orf166	0.839098	1.07015	0.001656	-2.82967	4.381e-06	5.21127
LOC655508	TcasGA2_TC034575	protein FAM166B-like	0.353878	1.76117	0.49498	1.34918	0.0005606	8.62736
LOC655547	TcasGA2_TC012067	cyclin-G-associated kinase	0.142628	1.38538	0.535614	-1.23525	0.005823	2.6257
LOC655587	TcasGA2_TC000175	peroxidase	0.00544	-3.07593	0.495147	-1.37483	0.008917	3.45288
LOC655591	TcasGA2_TC003752	ph	0.408759	1.18779	0.0755894	-1.73338	0.0001587	2.90836
LOC655697	TcasGA2_TC005963	autism susceptibility gene 2 protein	0.212728	-1.3264	0.472979	-1.2172	4.827e-07	3.62481
LOC655743	TcasGA2_TC011033	uncharacterized LOC655743	0.917343	1.01554	0.191667	-1.34047	3.217e-12	4.10783
LOC655783	TcasGA2_TC009297	uncharacterized LOC655783	0.0455126	-1.57616	0.340391	-1.32184	0.0003171	2.60929
LOC655795	TcasGA2_TC011960	5-hydroxytryptamine receptor	1	-1.0045	0.510826	-1.48857	0.001576	7.02963
LOC655829	TcasGA2_TC004563	cell division cycle and apoptosis regulator protein 1	0.118632	-1.24024	0.864043	-1.04483	0.000205	2.15445
LOC655884	TcasGA2_TC001722	Svp	0.827625	-1.06073	0.0544063	-1.88664	2.455e-05	3.57852
LOC655905	TcasGA2_TC004983	ATPase family AAA domain-containing protein 2	0.000298	1.73152	0.546852	-1.1613	1.187e-12	4.93865
LOC655933	TcasGA2_TC007653	Vsx	0.927243	1.01474	0.958122	-1.01434	3.096e-06	3.01898
LOC655969	TcasGA2_TC004316	sin3 histone deacetylase corepressor complex component SDS3	0.712179	-1.05863	0.541629	1.18753	0.0004366	2.18928
LOC655987	TcasGA2_TC004691	regulator of G-protein signaling 7	0.577145	1.08893	0.804862	-1.06659	0.0001495	2.34659
LOC655991	TcasGA2_TC004944	odorant receptor Or1	1	1	0.0285656	-458.437	0.003848	509.388
LOC655998	TcasGA2_TC030757	protein ecdysoneless	0.952982	-1.00893	0.949403	-1.01687	0.0002234	2.30858
LOC656017	TcasGA2_TC014255	TcSRC	0.914765	1.0157	0.736843	-1.07851	2.432e-05	2.30875
LOC656031	TcasGA2_TC005672	structural maintenance of chromosomes protein 1A	0.933726	1.01105	0.243614	-1.30259	0.0002659	2.0406
LOC656048	TcasGA2_TC002136	protein disulfide-isomerase TMX3	1.83e-05	1.94402	0.0582693	-1.6417	2.159e-10	4.14824
LOC656060	TcasGA2_TC004106	breast cancer anti-estrogen resistance protein 3	4.87e-06	-4.1519	0.177498	-1.63208	0.006505	2.48739
LOC656067	TcasGA2_TC004674	galactosylgalactosylxylosylprotein 3-beta-glucuronosyltransferase P	0.187213	-1.27796	0.67226	1.12957	0.006658	2.04136
LOC656073	TcasGA2_TC011371	chondroitin sulfate synthase 1	0.895601	1.04064	0.132007	-2.11481	0.00528	3.36193
LOC656141	TcasGA2_TC001571	Gcl	0.823876	1.03429	0.857061	1.0437	4.92e-07	2.83503
LOC656173	TcasGA2_TC002600	arginine kinase	0.0629458	6.34916	0.254407	-4.35596	0.009141	30.1464
LOC656174	TcasGA2_TC003843	ankyrin-2	0.109213	-1.25418	0.0132545	-1.73404	3.899e-08	2.96073
LOC656202	TcasGA2_TC006266	protein scylla	6.92e-09	2.70553	0.0421999	1.83696	0.0001639	2.49449
LOC656203	TcasGA2_TC006318	BTB/POZ domain-containing protein KCTD5	0.597143	-1.09954	0.828511	1.06528	0.004869	2.06356
LOC656223	TcasGA2_TC004141	OTU domain-containing protein 5-A	5.5e-05	1.98841	0.13671	-1.48058	1.38e-09	3.71409
LOC656234	TcasGA2_TC010229	synembryn-A	0.0149747	1.46919	0.528899	-1.17262	1.853e-06	2.85955
LOC656272	TcasGA2_TC015355	transmembrane protein 53	0.211362	1.6487	0.321776	-1.46557	0.0002994	5.68178
LOC656299	TcasGA2_TC001921	lethal(3)malignant brain tumor-like protein 4	0.015577	1.41081	0.491166	1.18745	0.00108	2.01764
LOC656301	TcasGA2_TC000076	dynein heavy chain 5	0.209226	1.47309	0.009801	-3.72757	3.199e-06	5.67954
LOC656302	TcasGA2_TC002122	DNA-binding protein SMUBP-2	0.0881483	1.53833	0.0706894	-2.10019	0.001531	3.73631
LOC656305	TcasGA2_TC016272	zinc finger matrin-type protein 2	0.0308312	1.39989	0.518072	-1.19988	2.015e-08	3.98809
LOC656314	TcasGA2_TC001980	very low-density lipoprotein receptor	0.0107076	1.4538	0.399318	-1.21826	6.163e-14	5.13642
LOC656333	TcasGA2_TC032344	B9 domain-containing protein 2	0.0128125	-1.89613	0.600751	1.14875	2.479e-05	3.21068
LOC656371	TcasGA2_TC006721	myb-like protein X	1	1	0.628686	-1.75121	1.037e-05	1750.39
LOC656381	TcasGA2_TC000075	SMC4	0.00117	-1.5527	0.395229	-1.20842	1.317e-09	3.33383
LOC656398	TcasGA2_TC004080	protein phosphatase 1 regulatory subunit 3B	0.225903	1.43854	0.0326354	-2.08475	7.108e-07	6.32135
LOC656402	TcasGA2_TC004671	glycogenin-2	0.932317	1.01333	0.0964438	1.4915	2.949e-08	3.277
LOC656415	TcasGA2_TC003570	shaven	0.000193	-2.06553	0.0002219	-2.97717	5.904e-05	2.50559
LOC656419	TcasGA2_TC002571	protein dopey-1 homolog	0.00454	1.56559	0.974343	1.00918	0.006524	2.00451
LOC656434	TcasGA2_TC014561	ribonuclease H2 subunit B	0.388835	-1.4441	0.314098	-1.59054	0.002251	4.02841
LOC656475	TcasGA2_TC001573	RNA polymerase-associated protein Rtf1	0.101791	1.28716	0.464016	-1.2094	7.394e-09	3.62459
LOC656480	TcasGA2_TC001965	VWFA and cache domain-containing protein 1	0.300425	1.21409	0.874961	1.04799	0.0001204	2.74229
LOC656483	TcasGA2_TC004110	phosphorylated CTD-interacting factor 1	0.205294	1.38535	0.205592	-1.60205	0.003891	2.87392
LOC656488	TcasGA2_TC004825	uncharacterized LOC656488	0.51865	1.12612	0.623194	-1.15781	0.0002409	2.73634
LOC656492	TcasGA2_TC011177	ELMO domain-containing protein 2	0.914854	1.03121	0.988164	1.00416	1.789e-11	6.24044
LOC656495	TcasGA2_TC000252	H6	0.0546499	-1.32898	0.816143	-1.05777	1.31e-05	2.47798
LOC656499	TcasGA2_TC003407	Fz2	0.265658	-1.41566	0.001785	-3.1751	1.374e-06	4.4338
LOC656519	TcasGA2_TC031160	nuclear migration protein nudC	0.210187	-1.19052	0.183302	-1.42189	5.033e-11	4.23417
LOC656553	TcasGA2_TC016292	RNA-binding protein Musashi homolog Rbp6	0.0831925	1.31711	0.0002399	-2.50267	2.653e-08	3.34425
LOC656555	TcasGA2_TC001439	WAS protein family homolog 1	0.0440418	1.40508	0.745308	-1.08734	3.675e-11	4.39961
LOC656565	TcasGA2_TC002522	tyrosine-protein kinase Src64B	0.809375	-1.05576	0.243793	-1.42277	0.0006734	2.5787
LOC656567	TcasGA2_TC016323	glutamate--cysteine ligase catalytic subunit	0.0238459	1.53359	0.536754	-1.20732	0.0001871	2.77949
LOC656593	TcasGA2_TC007648	RNA-binding protein 42	0.140897	1.27446	0.967841	1.01225	0.006718	2.03124
LOC656615	TcasGA2_TC006051	GTPase-activating protein CdGAPr	0.254659	-1.27396	0.966188	-1.01314	0.001162	2.50561
LOC656637	TcasGA2_TC010667	Msp-300	0.0927802	-1.28451	0.008057	-1.84279	4.12e-13	4.66051
LOC656639	TcasGA2_TC004144	PlexB	0.726844	1.06277	0.2327	-1.35101	1.555e-10	4.11107
LOC656708	TcasGA2_TC001714	arf-GAP with SH3 domain	0.559305	1.08815	0.964458	-1.01194	8.377e-05	2.46243
LOC656728	TcasGA2_TC015096	ATP-citrate synthase	0.878658	-1.022	0.320061	1.28079	5.788e-09	3.3016
LOC656730	TcasGA2_TC005175	ubiquitin-conjugating enzyme E2 H	0.998121	1.0009	0.898139	-1.04556	0.003207	2.30708
LOC656756	TcasGA2_TC007647	DDB1- and CUL4-associated factor 8	0.0111298	1.43626	0.440583	-1.20211	0.000148	2.201
LOC656757	TcasGA2_TC008001	probable phospholipid-transporting ATPase VD	0.52758	-1.10268	0.658327	-1.12856	2.715e-08	3.95085
LOC656813	TcasGA2_TC032354	nucleolin	0.737355	1.04974	0.422285	-1.27707	1.911e-05	2.71135
LOC656831	TcasGA2_TC001101	Ddx10	0.316358	1.15905	0.997871	-1.00097	0.001804	2.10926
LOC656832	TcasGA2_TC001220	WD repeat domain phosphoinositide-interacting protein 4	1.45e-08	2.46961	0.386695	1.27592	0.001946	2.33448
LOC656834	TcasGA2_TC000167	m7GpppN-mRNA hydrolase	0.0374954	1.40103	0.489134	-1.22151	3.87e-05	2.85907
LOC656854	TcasGA2_TC014566	division abnormally delayed protein	0.193925	-1.32686	0.380786	-1.30315	0.001373	2.40992
LOC656882	TcasGA2_TC016200	1-acyl-sn-glycerol-3-phosphate acyltransferase alpha	0.0611813	1.61195	0.0453241	-1.92055	1.814e-06	4.73349
LOC656919	TcasGA2_TC003063	kalirin	0.864178	1.0242	0.0516421	-1.55368	4.531e-11	3.77003
LOC657006	TcasGA2_TC003322	COP9 signalosome complex subunit 1	0.55952	1.09119	0.0458625	-1.71458	3.917e-05	2.47666
LOC657059	TcasGA2_TC001437	AP-1 complex subunit mu-1	0.377793	1.14028	0.930256	1.02094	1.841e-05	2.41323
LOC657074	TcasGA2_TC004698	lysine-specific demethylase 6A	0.0225932	-1.3909	0.0122395	-1.92383	8.506e-07	2.90642
LOC657103	TcasGA2_TC013626	rho GTPase-activating protein 18	0.379617	1.14341	0.04439	1.60785	0.000331	2.16018
LOC657108	TcasGA2_TC014764	UPF0430 protein CG31712	0.000607	1.67385	0.890276	-1.03739	0.001405	2.06782
LOC657155	TcasGA2_TC005276	polycomb group protein Psc	0.0148714	-1.63394	0.0002914	-3.45425	0.001342	2.30193
LOC657159	TcasGA2_TC004756	neurofibromin	0.0788451	1.31593	0.245689	1.37357	0.000203	2.50346
LOC657182	TcasGA2_TC007008	peptidyl-prolyl cis-trans isomerase D	0.0777861	1.36672	0.777158	1.08141	1.457e-05	3.01815
LOC657189	TcasGA2_TC014612	protein Mo25	0.16665	1.25729	0.460137	-1.27484	0.0009629	2.59265
LOC657218	TcasGA2_TC010832	neurogenic protein big brain	0.890806	-1.58137	0.397772	-4.77835	0.001181	72.1965
LOC657231	TcasGA2_TC002346	neurofilament heavy polypeptide	0.586178	1.07624	0.126747	-1.42684	4.164e-05	2.26
LOC657238	TcasGA2_TC004514	protein couch potato	0.038583	-1.36742	0.2278	-1.3616	5.405e-05	2.38589
LOC657240	TcasGA2_TC011289	GTP-binding protein SAR1b	0.145057	1.23246	0.410142	-1.21657	0.0003143	2.10719
LOC657246	TcasGA2_TC001302	protein SERAC1	0.410428	-1.25674	0.227248	-1.40552	1.754e-11	6.02652
LOC657257	TcasGA2_TC008518	protein xmas-2	0.179022	1.25793	0.347964	-1.28789	3.203e-06	2.9788
LOC657264	TcasGA2_TC014571	UPF0428 protein CXorf56 homolog	0.431698	1.13465	0.595589	1.17742	0.006593	2.10626
LOC657302	TcasGA2_TC004151	protein hook	0.00543	1.47032	0.720161	-1.08783	5.1e-09	3.29078
LOC657327	TcasGA2_TC007861	protein bark beetle	0.003	-1.51433	0.485663	-1.1804	0.0001371	2.14815
LOC657331	TcasGA2_TC013937	large subunit GTPase 1 homolog	0.0691978	1.33655	0.238436	-1.35352	2.439e-05	2.5665
LOC657338	TcasGA2_TC013228	autophagy-related protein 9A	0.0815399	1.45773	0.705929	1.10657	0.008685	1.99563
LOC657345	TcasGA2_TC008719	retained	0.822559	1.03404	0.977837	-1.00693	6.451e-12	4.84365
LOC657347	TcasGA2_TC009427	phosphatidylinositol-glycan biosynthesis class F protein	0.00996	1.5666	0.001326	-2.92358	0.0001196	2.56445
LOC657374	TcasGA2_TC010479	acetyl-coenzyme A synthetase	0.646276	-1.20849	0.715624	-1.19558	0.004094	4.61367
LOC657382	TcasGA2_TC001579	discoidin domain-containing receptor 2	0.0740334	1.62524	0.001137	-2.58097	1.609e-27	14.3991
LOC657387	TcasGA2_TC004700	prolyl 3-hydroxylase 1	0.246865	-1.50072	0.556926	-1.24522	0.003069	3.46773
LOC657400	TcasGA2_TC000163	uncharacterized LOC657400	0.000435	1.90159	0.50684	-1.19954	1.896e-13	6.29058
LOC657440	TcasGA2_TC001750	Dcr-1	0.623321	1.08992	0.923322	-1.02692	1.636e-05	2.81813
LOC657485	TcasGA2_TC007862	uncharacterized LOC657485	0.876777	1.02277	0.262276	-1.31797	0.0002002	2.24122
LOC657532	TcasGA2_TC010639	U4/U6 small nuclear ribonucleoprotein Prp31	0.228523	1.20514	0.358888	-1.28067	0.001349	2.07752
LOC657533	TcasGA2_TC002055	meiosis-specific nuclear structural protein 1	0.158198	-1.47476	0.0150559	-2.20079	8.8e-08	4.30154
LOC657565	TcasGA2_TC008521	alpha-(1	0.000659	1.79553	0.425492	-1.28481	0.0008236	2.75427
LOC657585	TcasGA2_TC009790	tyrosine-protein kinase Src42A	0.746847	1.04575	0.93417	-1.02205	4.695e-06	2.92782
LOC657588	TcasGA2_TC005663	ankyrin repeat and SAM domain-containing protein 4B	0.0991927	1.3742	0.591076	-1.18198	0.0002029	2.9567
LOC657616	TcasGA2_TC016060	nucleolysin TIA-1 isoform p40	0.931692	1.42389	0.003504	-786.942	0.007671	46.758
LOC657636	TcasGA2_TC003327	lysophosphatidylcholine acyltransferase	0.467418	1.82203	0.716919	1.14992	7.502e-07	38.7829
LOC657717	TcasGA2_TC003891	zfh2	0.000121	-3.50876	2.488e-09	-6.33134	2.447e-15	6.45167
LOC657773	TcasGA2_TC013029	neprilysin-11	0	-6.09481	0.001865	-2.56777	6.666e-06	2.58627
LOC657779	TcasGA2_TC004876	protein RMD5 homolog A	0.0673251	1.47327	0.739958	1.10463	0.001612	2.40944
LOC657811	TcasGA2_TC015826	histone-lysine N-methyltransferase SETD1B	0.0252515	1.37317	0.530614	-1.16648	5.152e-08	3.17563
LOC657817	TcasGA2_TC009040	CCA tRNA nucleotidyltransferase 1	0.025986	1.37029	0.796636	1.06671	8.922e-06	2.64646
LOC657854	TcasGA2_TC013703	inhibitor of growth protein 5	0.699754	1.08445	0.552144	1.19269	0.005263	2.40639
LOC657922	TcasGA2_TC005228	RNA polymerase-associated protein CTR9 homolog	0.0728955	1.31509	0.970828	-1.00905	3.587e-05	2.321
LOC657955	TcasGA2_TC002667	uncharacterized LOC657955	0.0180208	-2.28961	0.0219187	-2.8815	0.0002134	3.71167
LOC657971	TcasGA2_TC014996	trichoplein keratin filament-binding protein	0.609593	1.0828	0.934671	-1.02368	1.169e-07	3.23195
LOC657972	TcasGA2_TC014939	lim1	0.452871	1.47639	0.738245	-1.20476	0.001358	6.15064
LOC657985	TcasGA2_TC011989	6-phosphofructo-2-kinase/fructose-2	0.0280948	1.38449	0.808066	1.05864	4.539e-11	4.1236
LOC658025	TcasGA2_TC003128	serine/threonine-protein kinase SMG1	0.969951	-1.00534	0.345361	-1.26324	1.875e-05	2.52462
LOC658046	TcasGA2_TC014773	laminin subunit alpha-1	0.133063	-1.4596	0.0493451	-2.60578	0.0001286	3.34939
LOC658049	TcasGA2_TC015608	Eif4enif1	0.488316	1.11103	0.584942	1.1466	0.000903	2.05594
LOC658052	TcasGA2_TC010114	uncharacterized LOC658052	0.0128068	1.6134	0.612565	-1.17586	0.009541	2.24088
LOC658053	TcasGA2_TC009405	recombination repair protein 1	0.268483	1.16669	0.016498	-1.77739	6.16e-05	2.22247
LOC658054	TcasGA2_TC009432	ubiquitin-conjugating enzyme E2 R2	2.26e-05	2.05766	0.3257	-1.29496	1.004e-09	3.98658
LOC658096	TcasGA2_TC004551	GLEAN_04551	0.211082	1.37601	0.497753	1.2169	0.0003788	3.06374
LOC658104	TcasGA2_TC000973	INTS7	0.424639	1.14826	0.409994	-1.26985	9.963e-05	2.57186
LOC658105	TcasGA2_TC000456	microfibrillar-associated protein 1	0.0660478	1.3016	0.454226	-1.23713	1.406e-07	3.41327
LOC658127	TcasGA2_TC014622	monocarboxylate transporter 12	0.233443	42.349	0.489517	-3.69744	0.0001078	935.996
LOC658138	TcasGA2_TC009711	phytanoyl-CoA dioxygenase	0.478045	1.14187	0.353898	1.26424	1.271e-05	2.67531
LOC658150	TcasGA2_TC012484	vigilin	0.774403	1.04022	0.681771	-1.09801	9.043e-06	2.39143
LOC658154	TcasGA2_TC011641	alpha-2C adrenergic receptor	0.942618	-1.12011	0.118454	-3.42829	1.686e-06	44.8313
LOC658165	TcasGA2_TC004071	protein unc-13 homolog B	0.236052	2.63943	0.009406	-240.556	0.009908	27.7667
LOC658178	TcasGA2_TC004764	chondroitin sulfate proteoglycan 4	0.877277	1.02684	0.717905	-1.10433	0.0008742	2.24956
LOC658185	TcasGA2_TC001109	spectrin beta chain	0.000444	-1.62299	0.193492	-1.34008	4.215e-07	2.74366
LOC658188	TcasGA2_TC003127	RNA-binding protein 25	0.0943706	1.2915	0.906326	-1.03102	0.0002804	2.23362
LOC658197	TcasGA2_TC007481	serine/threonine-protein kinase SIK2	0.361239	1.6184	0.2624	-2.11215	0.0009318	7.01689
LOC658232	TcasGA2_TC002294	SUMO-activating enzyme subunit 2	0.963351	-1.00703	0.534977	1.16687	0.0002861	2.16614
LOC658234	TcasGA2_TC001677	tripartite motif-containing protein 2	0.0745034	1.27901	0.332584	-1.24661	0.0004255	2.0099
LOC658239	TcasGA2_TC000028	zinc finger CCCH domain-containing protein 15 homolog	0.582449	-1.07927	0.843505	-1.04751	0.0005406	2.01209
LOC658244	TcasGA2_TC032997	uncharacterized LOC658244	0.000163	-1.94478	0.022304	-1.87038	6.192e-07	3.16698
LOC658276	TcasGA2_TC007760	zinc finger protein jing homolog	0.122653	-1.32039	0.21642	-1.38096	3.89e-08	3.44633
LOC658279	TcasGA2_TC014000	calcium channel flower	0.0367894	1.5288	0.360449	-1.28447	0.002269	2.1218
LOC658288	TcasGA2_TC015093	rad50	0.561435	-1.08544	0.360322	-1.2615	2.43e-07	2.96258
LOC658306	TcasGA2_TC012828	cuticle protein 18.7	0.740819	-1.29854	0.717136	-1.47097	0.00595	12.02
LOC658349	TcasGA2_TC007761	SH3 and multiple ankyrin repeat domains protein 3	2.62e-13	-2.81843	0.114716	-1.45549	0.0001043	2.21321
LOC658352	NA	KRR1 small subunit processome component homolog	0.345977	1.14265	0.301321	-1.36996	0.008101	2.0502
LOC658407	TcasGA2_TC011429	centaurin-gamma-1A	0.51512	-1.12539	0.455364	-1.22902	0.001407	2.14226
LOC658414	TcasGA2_TC002665	protein TANC2	0.0259339	-1.41687	0.112202	-1.54998	7.584e-05	2.52904
LOC658419	TcasGA2_TC007869	serpin26	1.8e-06	-2.14923	0.334911	1.26092	0.000475	2.09626
LOC658423	TcasGA2_TC013905	dnaJ protein homolog 1	2.97e-05	1.98903	0.0623508	1.60156	0.0001148	2.33957
LOC658430	TcasGA2_TC014624	death-inducer obliterator 1	0.562489	1.08167	0.478811	-1.18431	0.0006075	2.00299
LOC658443	TcasGA2_TC033642	uncharacterized LOC658443	0.181766	5.63315	0.336518	-3.83748	0.003056	66.7494
LOC658493	TcasGA2_TC002507	transcription initiation factor TFIID subunit 1	0.0609276	1.30182	0.523427	-1.16113	1.566e-07	2.9738
LOC658496	TcasGA2_TC008015	proteasome subunit alpha type-3	0.345119	1.15241	0.995459	-1.00142	0.0004158	2.12836
LOC658500	TcasGA2_TC013944	histone deacetylase complex subunit SAP130	0.447481	1.11954	0.860478	-1.04408	4.089e-06	2.66645
LOC658513	TcasGA2_TC009435	transmembrane protein 214-B	0.261296	1.19542	0.374503	-1.24688	7.596e-05	2.36521
LOC658516	TcasGA2_TC009712	peptidyl-prolyl cis-trans isomerase CWC27 homolog	0.416783	1.13899	0.791929	1.08118	0.001269	2.2727
LOC658528	TcasGA2_TC011986	uncharacterized LOC658528	0.177129	-1.23424	1.217e-13	-9.88401	4.038e-22	8.85752
LOC658547	TcasGA2_TC011526	calcium-transporting ATPase type 2C member 1	0.0737925	1.29171	0.511523	1.1806	2.411e-10	3.96554
LOC658563	TcasGA2_TC000608	carbonic anhydrase 1	0.779551	-1.10906	0.6202	1.20254	0.0007456	4.75527
LOC658565	TcasGA2_TC003215	arf-GAP with Rho-GAP domain	0.192918	-1.20279	0.556248	-1.14526	1.027e-19	6.94633
LOC658584	TcasGA2_TC013000	glutamate synthase 1 [NADH]	8.47e-06	-1.8202	0.810459	1.05391	7.602e-06	2.38751
LOC658591	TcasGA2_TC008709	general transcription factor IIE subunit 2	0.000121	1.96597	0.971705	-1.01073	7.389e-06	3.11898
LOC658603	TcasGA2_TC012205	MICAL-like protein 1	0.0825595	-1.28396	0.181577	-1.39149	5.155e-06	2.68161
LOC658616	TcasGA2_TC000021	ribosomal protein S6 kinase alpha-5	0.269705	1.18644	0.153664	-1.49479	8.965e-05	2.35156
LOC658643	TcasGA2_TC004963	uncharacterized LOC658643	0.080993	51.8499	0.047259	-683.908	0.009978	756.706
LOC658647	TcasGA2_TC000607	MYCBP-associated protein	0.583896	-2.0366	0.700272	-1.44483	0.004071	28.3919
LOC658714	TcasGA2_TC003597	calcineurin-binding protein cabin-1	0.136006	1.24586	0.291507	-1.29264	3.551e-10	3.79832
LOC658715	TcasGA2_TC002736	ankyrin repeat domain-containing protein 54	0.00815	1.94033	0.155301	-1.61679	0.0001451	3.62401
LOC658730	TcasGA2_TC014625	RNA-binding protein 45	0.135256	1.30982	0.493107	-1.22722	3.57e-07	3.69144
LOC658738	TcasGA2_TC009437	putative ATP-dependent RNA helicase DHX30	0.494085	1.11811	0.165972	-1.49747	0.002024	2.11715
LOC658754	TcasGA2_TC010495	MAP kinase-interacting serine/threonine-protein kinase 1	1.01e-05	1.87526	0.529561	-1.1667	5.673e-13	4.69424
LOC658760	TcasGA2_TC010239	CYP6BK7	0.0244108	124.374	0.030862	-596.239	0.004746	660.69
LOC658776	TcasGA2_TC000606	histone-lysine N-methyltransferase 2C	0.195343	1.19966	0.892845	-1.03058	2.184e-12	4.12808
LOC658831	TcasGA2_TC004111	putative DNA helicase Ino80	0.601965	-1.0836	0.0981117	-1.48015	2.428e-10	3.81909
LOC658843	TcasGA2_TC004768	trithorax	0.44995	1.13484	0.085884	-1.64322	1.205e-06	3.4093
LOC658883	TcasGA2_TC009439	uncharacterized LOC658883	4.19e-05	-2.13505	0.0101201	-2.27605	0.003689	2.17662
LOC658889	TcasGA2_TC005866	HFM1	0.046051	18.0391	0.415108	-5.58993	0.006139	86.8231
LOC658901	TcasGA2_TC012916	liprin-alpha-1	0.0425306	1.3486	0.0892657	-1.52479	3.325e-06	2.73126
LOC658926	TcasGA2_TC002994	twinkle protein	0.267257	1.24891	0.91061	1.03336	0.002312	2.40339
LOC658929	TcasGA2_TC002548	NR5A3	0.400377	1.13278	0.0660439	-1.66027	4.438e-05	2.63395
LOC658955	TcasGA2_TC006112	protein-methionine sulfoxide oxidase MICAL3	0.493493	-1.1013	0.309615	1.25411	4.185e-06	2.52077
LOC658963	TcasGA2_TC011979	mediator of RNA polymerase II transcription subunit 19	0.416829	-1.18365	0.674315	1.13767	0.0002285	2.94593
LOC659003	TcasGA2_TC003900	active breakpoint cluster region-related protein	0.134312	1.23127	0.477146	-1.18574	4.433e-06	2.59259
LOC659034	TcasGA2_TC012430	CAP-Gly domain-containing linker protein 1	0.0513932	-1.32686	0.0294151	-1.71012	1.47e-06	2.75302
LOC659035	TcasGA2_TC012490	CTL-like protein 1	0.72698	-1.06026	0.004969	-2.1988	3.605e-07	3.07674
LOC659090	TcasGA2_TC014111	kinesin-7	0.702058	-1.05625	0.0757507	-1.62506	1.522e-08	3.42158
LOC659127	TcasGA2_TC001525	coiled-coil domain-containing protein 174	0.105058	1.28277	0.62953	1.13553	1.65e-05	2.72908
LOC659144	TcasGA2_TC004605	transmembrane protein 205	0.888582	1.08044	0.301834	2.01829	0.005419	5.18159
LOC659149	TcasGA2_TC011389	zinc finger SWIM domain-containing protein 8	0.00415	1.50727	0.135925	-1.46639	3.735e-06	2.75563
LOC659156	TcasGA2_TC003336	ganglioside-induced differentiation-associated protein 1	0.467465	-1.15063	0.335331	1.29948	0.002099	2.22198
LOC659158	TcasGA2_TC003435	phytanoyl-CoA dioxygenase domain-containing protein 1 homolog	0.000218	-2.69222	0.93014	-1.02707	2.151e-13	8.40052
LOC659171	TcasGA2_TC014005	reticulocalbin-2	0.00536	1.7668	0.308635	-1.35871	1.255e-06	4.04077
LOC659178	TcasGA2_TC014630	protein FAM76A	0.00626	1.60046	0.410293	-1.27861	0.001661	2.21685
LOC659211	TcasGA2_TC011545	E3 ubiquitin-protein ligase znrf1	0.0573091	1.45555	0.458354	-1.26477	0.006751	2.15145
LOC659212	TcasGA2_TC004377	uncharacterized LOC659212	0.626177	-1.20195	0.184424	-1.91655	0.001492	4.46966
LOC659222	TcasGA2_TC004424	protein crumbs	0.390671	-1.12764	0.715089	-1.08693	4.076e-07	2.76064
LOC659240	TcasGA2_TC013912	polycomb protein Asx	0.235719	1.47465	0.0911326	-1.82303	7.392e-07	6.43221
LOC659260	TcasGA2_TC006474	thickveins	0.564432	-1.09549	0.0642871	-1.63846	0.000702	2.12605
LOC659287	TcasGA2_TC004910	exostosin-2	0.732012	-1.06417	0.130599	-1.59642	8.807e-06	3.26325
LOC659311	TcasGA2_TC007628	bmm	6.02e-06	1.993	0.0451589	1.59927	9.207e-25	9.69089
LOC659317	TcasGA2_TC013697	uncharacterized LOC659317	0.1209	-1.27346	0.006374	-2.03511	3.698e-07	2.98584
LOC659349	TcasGA2_TC004260	low-density lipoprotein receptor-related protein 2	0.132197	-1.24325	0.0002411	-2.65968	1.016e-06	2.87199
LOC659353	TcasGA2_TC004378	cleavage stimulation factor subunit 2 tau variant	0.247931	-1.2808	0.969369	-1.01158	0.005363	2.11782
LOC659386	TcasGA2_TC013790	actin-related protein 2/3 complex subunit 5	0.0843067	-1.31502	0.002602	-2.3555	2.514e-07	3.79329
LOC659430	TcasGA2_TC008273	choline/ethanolaminephosphotransferase 1	0.627154	1.07505	0.824353	1.05088	1.777e-07	2.98684
LOC659436	TcasGA2_TC004846	early growth response protein 1-B	0.612132	-1.14232	0.0526979	-2.00599	0.001176	2.99849
LOC659444	TcasGA2_TC000228	myosin light chain kinase	0.603707	1.36221	0.257921	1.812	0.007622	6.92001
LOC659457	TcasGA2_TC013857	neurotrophin receptor-interacting factor 1	0.100292	-1.43648	0.001847	-2.75513	7.274e-06	3.11012
LOC659479	TcasGA2_TC012434	WRCH-1	0.524485	-1.1463	0.40951	1.26773	0.004537	2.2505
LOC659486	TcasGA2_TC010893	adenylate cyclase type 6	0.236239	1.53109	0.520968	-1.24569	2.237e-06	7.17204
LOC659516	TcasGA2_TC008417	Pvf3	8.41e-08	-2.4687	4.613e-07	-4.73285	1.652e-06	3.52011
LOC659521	TcasGA2_TC014503	intersectin-1	0.00731	1.53148	0.0984746	-1.54273	2.964e-06	2.90403
LOC659533	TcasGA2_TC009111	BicD	0.000861	1.6105	0.0468724	-1.63395	9.71e-08	3.07515
LOC659567	TcasGA2_TC001238	sev	0.629276	-1.25456	0.0107944	-4.13714	2.056e-05	7.2248
LOC659578	TcasGA2_TC008022	transmembrane protein 131	0.00201	1.53037	0.265272	1.31967	0.001025	2.02648
LOC659607	TcasGA2_TC010372	RNA-binding protein 40	0.211743	1.24288	0.666387	1.12569	0.001005	2.19589
LOC659642	TcasGA2_TC007210	protein FAM114A2	7.38e-05	2.63632	0.008008	-2.20561	6.181e-11	7.47695
LOC659660	TcasGA2_TC009195	protein salvador homolog 1	0.432465	1.18444	0.940686	-1.02	2.483e-11	5.26873
LOC659670	TcasGA2_TC012192	mRNA-decapping enzyme 1B	0.984337	-1.00317	0.695291	1.10893	0.0006827	2.19393
LOC659713	TcasGA2_TC007877	FAT	0.940975	-1.01126	0.0396485	-1.66589	1.856e-06	2.68092
LOC659723	TcasGA2_TC013301	transcriptional regulator ATRX homolog	0.0539789	1.33949	0.428463	1.21889	0.0003998	2.18381
LOC659775	TcasGA2_TC007626	5'-AMP-activated protein kinase subunit beta-1	0.0292886	1.5492	0.1876	-1.48185	6.96e-05	2.91726
LOC659839	TcasGA2_TC000313	WD repeat-containing protein 46	0.780358	1.04179	0.986571	1.00438	0.0001302	2.22454
LOC659876	TcasGA2_TC012378	peptidyl-prolyl cis-trans isomerase-like 2	0.489003	1.13301	0.44458	-1.24722	0.000294	2.45605
LOC659887	TcasGA2_TC000054	pyrimidodiazepine synthase	0.330883	-1.20627	0.10062	-1.54995	0.000634	2.19493
LOC659892	TcasGA2_TC011550	DNA polymerase epsilon subunit C	0.632478	-1.08706	0.947791	1.02013	6.482e-06	2.92006
LOC659903	TcasGA2_TC000780	dentin sialophosphoprotein	0.0355041	1.39618	0.69852	-1.11213	0.002914	2.04908
LOC659911	TcasGA2_TC003443	metallophosphoesterase domain-containing protein 1	0.00383	1.60863	0.0678472	-2.05494	0.001755	2.38399
LOC659923	TcasGA2_TC015332	microprocessor complex subunit DGCR8	0.53709	1.12848	0.565878	-1.1921	0.0007592	2.52697
LOC659951	TcasGA2_TC006851	DENN domain-containing protein 1B	0.99253	-1.00193	0.858439	-1.05292	0.003483	2.06722
LOC659984	TcasGA2_TC014507	ETS-like protein pointed	0.0220269	-1.47311	0.012308	-1.95277	5.139e-06	2.70621
LOC660021	TcasGA2_TC012909	enhancer of mRNA-decapping protein 4	0.0284549	1.38187	0.0410524	-1.79611	0.0001886	2.57735
LOC660066	TcasGA2_TC012381	corepressor interacting with RBPJ 1	0.17443	1.21014	0.773563	-1.07443	1.21e-11	4.26437
LOC660070	TcasGA2_TC011687	transcription factor E2F5	0.118005	1.24211	0.239449	-1.34673	8.979e-05	2.33196
LOC660100	TcasGA2_TC003799	pleckstrin homology-like domain family B member 1	0.586158	-1.08399	0.0679725	-1.56751	6.415e-12	4.50418
LOC660136	TcasGA2_TC011686	huntingtin-interacting protein 1	0.291357	-1.15955	0.824015	-1.05342	0.0003227	2.05608
LOC660140	TcasGA2_TC010796	Sdc	0.0581226	1.34167	0.891809	1.03386	0.0002052	2.16791
LOC660153	TcasGA2_TC006593	protein lethal(2)essential for life	0.00208	2.40481	0.237328	-1.45784	5.505e-13	9.23873
LOC660173	TcasGA2_TC013685	mediator of RNA polymerase II transcription subunit 15	0.792997	1.04415	0.431862	-1.24258	0.002584	2.05136
LOC660174	TcasGA2_TC013601	probable DNA mismatch repair protein Msh6	0.207898	-1.19586	0.381229	-1.25375	0.0005871	2.09674
LOC660199	TcasGA2_TC011685	calmodulin-lysine N-methyltransferase	0.364227	1.15346	0.790855	1.07884	0.007506	1.99895
LOC660271	TcasGA2_TC006901	protein SPT2 homolog	0.0343918	1.38772	0.621498	-1.12963	1.448e-11	4.28669
LOC660279	TcasGA2_TC004778	hypothetical protein	0.675158	1.06929	0.499618	-1.19723	0.0001121	2.33763
LOC660295	TcasGA2_TC013522	protein FAN	0.00373	1.71551	0.517336	1.2103	0.001828	2.33278
LOC660297	TcasGA2_TC013295	two pore potassium channel protein sup-9	1	1	0.626234	1.90299	4.158e-05	1096.31
LOC660307	TcasGA2_TC033649	leucine-rich repeat-containing protein 15	0.840458	-1.239	0.539905	-2.26702	0.002288	15.1872
LOC660314	TcasGA2_TC012383	early endosome antigen 1	0.535078	1.80863	0.119699	-5.14182	8.614e-05	46.4243
LOC660318	TcasGA2_TC012676	dual specificity protein phosphatase Mpk3	0.501924	1.13727	0.0852379	-1.66266	0.0001538	2.60278
LOC660350	TcasGA2_TC007467	ATP-binding cassette sub-family G member 1	0.00225	-1.67486	0.659597	1.11649	9.595e-07	2.82029
LOC660354	TcasGA2_TC033075	protein grindelwald	0.000183	1.77562	0.909839	1.03142	8.423e-05	2.42317
LOC660367	TcasGA2_TC008693	AT-rich interactive domain-containing protein 4B	0.0490635	1.32227	0.240975	-1.31113	1.018e-17	6.00466
LOC660369	TcasGA2_TC009543	single-strand selective monofunctional uracil DNA glycosylase	0.418866	1.19235	0.191875	-1.5323	0.0006125	3.07587
LOC660389	TcasGA2_TC000130	dynein intermediate chain 3	0.155901	1.79514	0.599994	-1.21334	4.39e-06	8.45736
LOC660417	TcasGA2_TC014516	spn-E	0.00282	1.54366	0.850334	-1.04829	1.831e-06	2.70293
LOC660431	TcasGA2_TC009106	synaptic vesicle membrane protein VAT-1 homolog-like	3.28e-06	-2.0981	0.825088	1.06486	0.001401	2.17779
LOC660469	TcasGA2_TC002986	putative ATP-dependent RNA helicase TDRD12	0.109866	1.29334	0.772727	1.07969	0.00126	2.10626
LOC660490	TcasGA2_TC008691	nicalin-1	0.305865	-1.20937	0.27655	-1.40871	0.006489	2.09496
LOC660513	TcasGA2_TC001606	mid1-interacting protein 1-B	0.209976	1.22689	0.125987	1.46433	7.999e-06	2.7127
LOC660515	TcasGA2_TC006983	hemicentin-1	0.320886	1.47688	0.0404784	-4.21106	0.006696	4.17278
LOC660533	TcasGA2_TC003987	titin	8.92e-08	-2.19719	3.324e-06	-3.05277	2.804e-16	5.45711
LOC660568	TcasGA2_TC000132	protein sel-5	0.0266309	1.38909	0.50345	-1.19506	0.0001249	2.42431
LOC660584	TcasGA2_TC000987	uncharacterized LOC660584	0.0496691	1.3465	0.276252	-1.35567	0.0003561	2.25566
LOC660606	TcasGA2_TC014972	vacuolar protein sorting-associated protein 37C	0.938222	-1.01224	0.66808	1.13426	0.0009529	2.26787
LOC660631	TcasGA2_TC001631	protein lap1	0.157831	1.35539	0.0776308	-1.93025	0.0001308	4.41557
LOC660634	TcasGA2_TC010447	coiled-coil domain-containing protein 25	0.116433	1.36887	0.30548	-1.37706	0.001151	2.61371
LOC660661	TcasGA2_TC013165	Sox21b	0.0188407	-1.6564	0.288674	-1.40843	0.008191	2.0547
LOC660665	TcasGA2_TC015071	N-acetylglucosaminyl-phosphatidylinositol de-N-acetylase	0.410533	1.18871	0.021357	-1.94687	7.915e-06	3.12044
LOC660670	TcasGA2_TC009545	cullin-1	0.229822	1.20078	0.868257	1.04059	3.88e-06	2.71275
LOC660682	TcasGA2_TC012804	A-kinase anchor protein 10	0.0459522	1.34451	0.929336	-1.02355	0.001414	2.04178
LOC660690	TcasGA2_TC005177	solute carrier family 12 member 4	0.0780081	1.63147	0.412247	-1.24186	4.141e-18	10.2401
LOC660704	TcasGA2_TC003092	pleckstrin homology domain-containing family G member 1	0.871261	1.0362	0.0001123	-2.96069	7.581e-12	5.14613
LOC660717	TcasGA2_TC013163	Dichaete	0.249395	37.4786	0.0270638	-524.096	0.003784	582.456
LOC660755	TcasGA2_TC004589	protein grainyhead	0.0425835	-1.33215	0.341896	-1.262	9.691e-08	3.08679
LOC660769	TcasGA2_TC030735	basement membrane-specific heparan sulfate proteoglycan core protein	2.22e-16	-3.29549	6.132e-10	-4.74182	4.605e-15	5.1029
LOC660780	TcasGA2_TC010143	Sema-1a	0.330857	1.33214	0.005045	-2.26878	1.158e-16	9.69999
LOC660815	TcasGA2_TC003352	tyrosine-protein kinase-like otk	0.514835	-1.29512	0.171868	-1.75246	0.000494	4.75392
LOC660861	TcasGA2_TC004637	WD repeat-containing protein 35	0.190292	-1.32688	0.115323	-1.61385	0.0002224	2.65516
LOC660873	TcasGA2_TC008274	cetn2	0.0144249	1.45121	0.253725	-1.35108	1.717e-10	4.31926
LOC660875	TcasGA2_TC030468	So	0.0851861	-1.39432	0.062194	1.66034	0.0006447	2.32269
LOC660878	TcasGA2_TC014290	spir	0.159801	1.27801	0.432051	-1.32972	0.007758	2.14666
LOC660879	TcasGA2_TC013414	mRNA-capping enzyme	0.000502	1.72366	0.879987	-1.04543	0.001524	2.17822
LOC660883	TcasGA2_TC015636	uncharacterized protein KIAA1109	0.710449	1.05375	0.547063	-1.14374	0.0004471	2.01961
LOC660888	TcasGA2_TC009548	prolow-density lipoprotein receptor-related protein 1	0.00505	-1.81284	0.009225	-1.87816	2.497e-21	8.8916
LOC660909	TcasGA2_TC001602	bun	0.0899155	1.63248	0.382868	1.34146	0.001943	3.81498
LOC660924	TcasGA2_TC002791	protein Jumonji	0.8469	1.02796	0.127323	-1.47454	0.00101	2.01748
LOC660930	TcasGA2_TC014024	TBC1 domain family member 24	1e-08	2.44809	0.769292	1.08199	7.878e-06	2.9239
LOC660941	TcasGA2_TC009451	cilia- and flagella-associated protein 45	0.338551	-1.19784	0.114002	-1.55241	1.301e-05	2.92953
LOC660980	TcasGA2_TC000210	sli	0.287382	-1.40225	0.003541	-2.78852	1.478e-06	4.78552
LOC660983	TcasGA2_TC008037	kinesin-like protein CG14535	4.55e-07	-3.25761	5.876e-08	-7.10089	0.002535	2.16124
LOC661004	TcasGA2_TC005627	espin	0.251958	1.68043	0.552166	-1.46218	0.003933	5.7925
LOC661017	TcasGA2_TC000136	FAD synthase	0.174054	1.40302	0.831931	1.0624	1.266e-05	4.05382
LOC661020	TcasGA2_TC001601	zinc finger MYM-type protein 3	0.177559	1.20562	0.0725464	-1.55534	4.482e-07	2.78739
LOC661026	TcasGA2_TC002107	calcium/calmodulin-dependent protein kinase kinase 2	0.00766	-2.03269	0.002431	-3.6065	0.009474	2.20061
LOC661042	TcasGA2_TC007894	alpha-actinin	0.000944	-1.59489	0.626907	1.11574	4.387e-06	2.51785
LOC661046	TcasGA2_TC014129	LIM domain transcription factor LMO4.1	2.22e-05	-2.49318	0.0350382	-1.80779	1.709e-08	3.52629
LOC661047	TcasGA2_TC014226	kinesin-3A	0.380203	1.13899	0.826377	1.0544	0.0001611	2.2362
LOC661050	TcasGA2_TC013284	UPF0160 protein	0.203626	1.1981	0.0293302	-1.74245	1.803e-05	2.58123
LOC661118	TcasGA2_TC012393	kelch-like protein 26	0.209644	1.22775	0.685192	-1.11104	0.0001197	2.40885
LOC661123	TcasGA2_TC010386	SNF-related serine/threonine-protein kinase	0.0239519	-1.63715	0.406995	-1.2798	3.12e-05	2.8356
LOC661131	TcasGA2_TC010450	GRIP and coiled-coil domain-containing protein 2	0.00546	1.47271	0.790242	-1.06767	5.975e-08	3.07907
LOC661240	TcasGA2_TC016023	protein suppressor of white apricot	0.00594	1.62336	0.0922125	-1.72471	0.005975	2.13082
LOC661245	TcasGA2_TC004909	zinc finger C4H2 domain-containing protein	0.0486011	1.60335	0.547926	-1.20308	0.001267	2.75198
LOC661269	TcasGA2_TC009892	probable multidrug resistance-associated protein lethal(2)03659	3.15e-18	3.53265	0.499445	-1.16711	1.031e-12	4.26431
LOC661277	TcasGA2_TC005922	U3 small nucleolar ribonucleoprotein protein MPP10	0.152078	1.22344	0.656801	1.1191	0.0002849	2.15516
LOC661278	TcasGA2_TC006356	protein split ends	0.149311	-1.23117	0.210086	-1.35368	3.562e-14	5.13732
LOC661286	TcasGA2_TC011673	suppression of tumorigenicity 5 protein	0.594807	1.07912	0.525946	1.16427	2.608e-07	2.89352
LOC661291	TcasGA2_TC012898	Mdn1	1.77e-09	2.39579	0.497248	1.16759	1.055e-05	2.44484
LOC661332	TcasGA2_TC008955	uncharacterized LOC661332	0.418846	4.48281	0.318667	-6.13062	0.0009671	107.17
LOC661337	TcasGA2_TC009826	protein prickle-like	0.247849	-1.31164	0.001644	-2.97431	9.352e-05	3.03931
LOC661351	TcasGA2_TC004397	kinesin-2A	0.000843	2.26115	0.213935	-1.84516	0.008419	3.12815
LOC661361	TcasGA2_TC001142	KAT8 regulatory NSL complex subunit 3	0.352806	1.13918	0.925446	1.02286	0.0001326	2.19141
LOC661365	TcasGA2_TC003645	mitogen-activated protein kinase kinase kinase 13	0.802414	1.05005	0.516008	-1.24303	0.001411	2.9393
LOC661400	TcasGA2_TC004357	PH-interacting protein	0.259069	1.21039	0.409498	1.25825	3.242e-06	3.18455
LOC661420	TcasGA2_TC013511	H15	0.830467	1.07403	0.192568	-1.64422	0.001413	3.49177
LOC661430	TcasGA2_TC009831	endoplasmic reticulum metallopeptidase 1	0.711702	1.05331	0.254557	-1.33787	7.112e-06	2.53965
LOC661438	TcasGA2_TC012082	rut	0.0188439	-1.39174	0.0271436	-1.70311	5.366e-14	4.62425
LOC661447	TcasGA2_TC004398	uncharacterized LOC661447	0.289931	-1.16471	0.350107	1.25703	1.421e-05	2.52718
LOC661456	TcasGA2_TC003254	intraflagellar transport protein 122 homolog	0.243184	1.20636	0.355941	1.29313	0.001839	2.16474
LOC661461	TcasGA2_TC014136	protein RRP5 homolog	0.0766761	1.30473	0.746797	-1.09065	4.966e-07	2.94432
LOC661485	TcasGA2_TC016255	hypothetical protein	1.92e-07	-2.38984	8.574e-05	-2.68721	7.276e-14	5.01992
LOC661501	TcasGA2_TC007191	T-complex protein 11-like protein 1	0.880496	1.02038	0.0994549	1.48928	0.0001841	2.08721
LOC661504	TcasGA2_TC013507	hemocyte protein-glutamine gamma-glutamyltransferase	0.0230087	-2.38873	0.484235	-1.2702	0.0005503	3.86457
LOC661548	TcasGA2_TC013151	pre-mRNA-splicing factor CWC25 homolog	0.255167	1.20478	0.83636	-1.06036	8.057e-06	2.82609
LOC661564	TcasGA2_TC030587	glycoprotein-N-acetylgalactosamine 3-beta-galactosyltransferase 1	0.205063	1.26861	0.850062	1.05523	4.55e-09	4.43264
LOC661583	TcasGA2_TC003460	LanA	1.36e-13	-3.15377	0.000493	-2.4512	4.996e-08	3.15292
LOC661616	TcasGA2_TC005163	small G protein signaling modulator 3 homolog	0.776344	-1.07728	0.167083	-1.60691	0.0005609	3.29072
LOC661686	TcasGA2_TC033431	nuclear speckle splicing regulatory protein 1	0.242013	1.21076	0.609923	-1.15925	8.334e-05	2.85647
LOC661786	TcasGA2_TC004466	uncharacterized LOC661786	0.148701	1.26414	0.532374	1.18093	0.0009499	2.1841
LOC661803	TcasGA2_TC009902	nucleoporin SEH1	0.265179	-1.24014	0.66961	-1.12048	0.001731	2.14196
LOC661809	TcasGA2_TC034037	titin-like	0.982247	1.00329	0.89596	-1.03168	2.673e-05	2.40819
LOC661822	TcasGA2_TC007934	clathrin light chain	0.137432	1.25456	0.726069	1.09581	0.0004095	2.19098
LOC661839	TcasGA2_TC014143	protein kinase DC2	0.376702	1.28243	0.966357	1.01448	0.00295	3.17674
LOC661858	TcasGA2_TC005459	prominin-like protein	0.0229943	-1.39791	0.191186	-1.41529	4.578e-05	2.35946
LOC661868	TcasGA2_TC004578	protein KRTCAP2 homolog	0.537028	-1.12956	0.175517	-1.46926	0.00126	2.16866
LOC661892	TcasGA2_TC008936	protein SOX-15	1.84e-06	2.11295	2.429e-05	-3.20132	1.826e-25	11.4363
LOC661905	TcasGA2_TC011813	serine/arginine repetitive matrix protein 2	0.0989971	1.2722	0.666884	1.12379	7.053e-05	2.53102
LOC661922	TcasGA2_TC007446	sprouty	0.0890118	-2.05388	0.310345	-1.42887	3.887e-05	4.58389
LOC661929	TcasGA2_TC013148	NR2E3	0.0304204	1.3906	0.710568	1.10002	8.15e-05	2.51323
LOC661936	TcasGA2_TC010155	Wnt7	0.875033	-1.30456	0.241887	-3.74517	0.002631	31.1353
LOC661943	TcasGA2_TC005613	surface protein	0.099657	3.54581	0.79617	-1.25264	0.00127	18.9438
LOC661994	TcasGA2_TC010403	U2 small nuclear ribonucleoprotein auxiliary factor 35 kDa subunit-related protein 2	0.273886	1.27768	0.571467	-1.19384	0.000539	2.97565
LOC662006	TcasGA2_TC007180	dachsous	2.54e-05	-1.80775	0.003691	-1.95952	4.464e-12	4.06318
LOC662029	TcasGA2_TC011808	E3 ubiquitin-protein ligase HECW2	0.0155134	-1.46591	0.0202577	-1.83538	5.246e-06	2.63771
LOC662115	TcasGA2_TC007444	eukaryotic translation initiation factor 5B	0.88796	-1.01956	0.359961	-1.24044	1.901e-05	2.32839
LOC662164	TcasGA2_TC009839	mediator of RNA polymerase II transcription subunit 8	0.0143764	1.58917	0.276417	-1.39102	0.0002851	2.64324
LOC662167	TcasGA2_TC006501	E3 ubiquitin-protein ligase RBBP6	0.845485	1.02996	0.93823	1.0201	2.52e-06	2.82383
LOC662182	TcasGA2_TC003186	JNK-interacting protein 3	0.0702307	1.28479	0.871701	-1.03821	3.085e-08	3.11727
LOC662185	TcasGA2_TC032806	TWiK family of potassium channels protein 9	0.260775	37.1792	0.0217474	-1421.82	0.003911	1579.8
LOC662205	TcasGA2_TC012304	biorientation of chromosomes in cell division protein 1-like 1	0.0439963	1.35436	0.73754	1.09295	6.081e-05	2.34376
LOC662208	TcasGA2_TC011608	Khc	0.710598	-1.05404	0.60062	-1.14423	0.0007505	2.09316
LOC662237	TcasGA2_TC005527	protein lethal(2)essential for life	0.288486	2.20595	0.698132	1.38126	0.008598	10.8062
LOC662238	TcasGA2_TC006774	tudor and KH domain-containing protein	0.277295	1.19316	0.396801	-1.2579	0.001383	2.12543
LOC662239	TcasGA2_TC012169	ABC transporter G family member 20	1.34e-09	-4.08101	0.89996	-1.03058	8.254e-07	2.92805
LOC662254	TcasGA2_TC008293	ATP-binding cassette sub-family G member 4	0.000816	-1.82133	0.0576427	-1.64962	2.964e-08	3.46556
LOC662256	TcasGA2_TC013567	uncharacterized LOC662256	0.00269	2.1181	0.202308	-1.79145	0.003666	3.20547
LOC662268	TcasGA2_TC009637	protein KRI1 homolog	0.360037	1.13402	0.319187	-1.27805	0.00025	2.14352
LOC662272	TcasGA2_TC006248	centrosomal protein of 162 kDa	0.373074	1.22836	0.52932	-1.19326	4.604e-14	6.25958
LOC662281	TcasGA2_TC012875	gametogenetin-binding protein 2-like	0.080604	1.29775	0.913051	1.03348	2.64e-06	3.41634
LOC662308	TcasGA2_TC009171	probable splicing factor	0.776608	1.04817	0.909462	-1.03284	9.831e-07	3.32727
LOC662320	TcasGA2_TC002933	U1 small nuclear ribonucleoprotein 70 kDa	0.436649	1.1286	0.877796	-1.0428	0.0001623	2.46234
LOC662325	TcasGA2_TC000405	LDLR chaperone boca	0.572887	1.08665	0.92153	-1.02511	0.000916	2.03829
LOC662330	TcasGA2_TC007586	39S ribosomal protein L19	0.974312	1.00576	0.664807	-1.13991	0.0005492	2.42705
LOC662354	TcasGA2_TC012580	caspase Nc-like	0.172059	1.28192	0.294072	-1.37331	0.0001862	2.56831
LOC662402	TcasGA2_TC007046	hect E3 ubiquitin ligase	0.16341	1.22587	0.592768	1.12483	0.0004415	1.99943
LOC662415	TcasGA2_TC009567	nephrin	0.25054	1.88847	0.0974754	-3.54427	0.002335	7.55575
LOC662417	TcasGA2_TC009844	cystatin	0.00303	1.49511	0.949269	1.01578	9.444e-10	3.71061
LOC662441	TcasGA2_TC013753	Hs2st	0.0177272	1.53674	0.952545	-1.01708	0.0001909	2.76539
LOC662471	TcasGA2_TC007174	uncharacterized LOC662471	1	1	0.189047	-33.027	0.005981	728.871
LOC662475	TcasGA2_TC014245	probable peroxisomal acyl-coenzyme A oxidase 1	0.122711	-1.28773	0.963999	1.01206	2.716e-05	2.54138
LOC662485	TcasGA2_TC009341	Fanconi anemia group M protein	0.0515706	1.37905	0.256259	1.36395	0.005842	2.02345
LOC662493	TcasGA2_TC012166	Stk11	0.222556	1.3128	0.483751	1.22534	9.977e-05	3.07032
LOC662495	TcasGA2_TC012878	uncharacterized LOC662495	1.04e-08	2.28215	0.430586	-1.20106	1.585e-09	3.43531
LOC662516	TcasGA2_TC008923	Myo22	0.000463	-1.71427	0.0214577	-1.78229	1.801e-18	6.79524
LOC662545	TcasGA2_TC013393	dolichyldiphosphatase 1	0.37204	1.21034	0.590428	-1.18074	2.664e-08	3.85858
LOC662547	TcasGA2_TC015284	uncharacterized LOC662547	6.68e-05	3.21689	0.444818	-1.44242	0.003354	4.11846
LOC662550	TcasGA2_TC009916	nuclear export mediator factor NEMF homolog	0.00474	1.5181	0.385197	-1.24243	2.148e-06	2.79096
LOC662569	TcasGA2_TC000401	FAT	3.31e-07	-2.10306	0.002766	-2.03107	7.261e-18	6.05174
LOC662575	TcasGA2_TC013655	hemicentin-1	0.484238	3.38386	0.0862716	-27.0504	0.00151	124.472
LOC662585	TcasGA2_TC009076	microtubule-actin cross-linking factor 1	0.000345	-1.66714	0.009008	-1.85974	2.361e-13	4.61209
LOC662602	TcasGA2_TC032729	1-phosphatidylinositol 4	0.000628	1.62478	0.0606847	1.59665	0.0001418	2.3011
LOC662613	TcasGA2_TC009337	S phase cyclin A-associated protein in the endoplasmic reticulum	0.0529386	1.32594	0.003758	-2.05269	7.33e-08	3.09999
LOC662616	TcasGA2_TC008996	nkx2.1	0.0580859	-1.33953	0.875851	1.03861	3.039e-06	2.77919
LOC662636	TcasGA2_TC008066	myotubularin-related protein 6	0.0266671	1.61984	0.629646	1.15	0.002976	2.53084
LOC662660	TcasGA2_TC010884	BCL2/adenovirus E1B 19 kDa protein-interacting protein 3	0.102	1.28809	0.923256	1.02437	0.0001269	2.28706
LOC662663	TcasGA2_TC000747	autophagy protein 5	0.968823	1.00795	0.2364	-1.36506	2.288e-06	2.99627
LOC662676	TcasGA2_TC015502	potassium voltage-gated channel subfamily H member 6	0.742809	1.22911	0.396904	-2.05176	0.009922	7.60919
LOC662702	TcasGA2_TC008067	UHRF1-binding protein 1	0.024432	1.37288	0.402464	-1.26395	0.0004609	2.24669
LOC662706	TcasGA2_TC013652	DNA repair protein complementing XP-A cells homolog	0.577095	1.09392	0.355803	-1.35754	1.409e-11	5.35356
LOC662707	TcasGA2_TC013389	serpin29	0.772515	-1.06022	0.324017	-1.38255	0.002923	2.45669
LOC662729	TcasGA2_TC002962	titin	0.0121306	1.52491	0.64863	1.11323	6.14e-13	5.01686
LOC662734	TcasGA2_TC013487	solute carrier family 2	0.0822422	54.8472	0.597028	-2.23659	0.0004824	1274.83
LOC662742	TcasGA2_TC009849	zinc finger protein 260	0.0212947	1.45493	0.805136	-1.07483	0.0009032	2.27483
LOC662770	TcasGA2_TC014313	facilitated glucose transporter protein 1	0.0223046	117.8	0.001597	-1106.39	1.919e-05	1226.2
LOC662817	TcasGA2_TC002960	motile sperm domain-containing protein 2	0.104203	1.24857	0.460815	1.18756	6.012e-06	2.47553
LOC662829	TcasGA2_TC008993	metastasis suppressor protein 1	3.12e-06	-2.05096	0.004644	-2.02266	2.937e-07	2.983
LOC662847	TcasGA2_TC014163	alpha-taxilin	0.000129	1.8837	0.750255	-1.08509	7.187e-06	2.74403
LOC662931	TcasGA2_TC030730	calpain-C	0.0282648	-1.38728	0.0571327	-1.61557	0.000286	2.15303
LOC662936	TcasGA2_TC014414	ribonuclease P protein subunit p40-like	0.37263	-1.15625	0.56028	1.16793	0.001441	2.10974
LOC662946	TcasGA2_TC006168	transcription factor A	0.374246	-1.15042	0.640217	1.13978	0.0001209	2.36829
LOC662956	TcasGA2_TC003480	CYP353A1	4.37e-05	2.04426	0.247869	1.41944	3.7e-08	3.91676
LOC662957	TcasGA2_TC007804	protein king tubby	0.0259903	1.42549	0.64973	-1.12661	1.65e-06	2.93117
LOC662977	TcasGA2_TC012588	dnc	0.360978	-1.35701	0.0277036	-3.31195	0.009906	3.05592
LOC663012	TcasGA2_TC003481	negative elongation factor B	0.985546	-1.00294	0.670467	1.12872	0.002174	2.00601
LOC663037	TcasGA2_TC007573	ubiquitin carboxyl-terminal hydrolase 46	0.0716342	1.39741	0.182881	1.43796	0.0005277	2.54224
LOC663043	TcasGA2_TC013382	protein smg8	0.975091	-1.0065	0.484024	1.24093	0.009211	2.19075
LOC663101	TcasGA2_TC031204	ethanolaminephosphotransferase 1-like	0.0693728	1.5409	0.665052	-1.15242	0.00139	2.43894
LOC663146	TcasGA2_TC007807	cilia- and flagella-associated protein 44	0.369179	1.13491	0.14213	-1.54025	0.001474	2.02937
LOC663150	TcasGA2_TC013737	transmembrane protein 198	0.413262	1.94514	0.669379	-1.40592	0.0004512	19.4145
LOC663159	TcasGA2_TC005977	partner of Y14 and mago	0.0051	1.56775	0.178925	-1.44474	4.423e-07	3.24035
LOC663164	TcasGA2_TC012147	TBC1D9	0.00216	1.70817	0.982325	-1.00761	0.0002722	2.54261
LOC663176	TcasGA2_TC008477	ral GTPase-activating protein subunit beta	0.410067	1.15899	0.960077	-1.01442	0.006736	2.00343
LOC663179	TcasGA2_TC014420	Esyt2b	0.371644	-1.78263	0.277794	-2.33697	0.003782	8.04783
LOC663197	TcasGA2_TC007685	NEDD8 ultimate buster 1	0.009	1.49811	0.961529	-1.01393	1.873e-05	2.93372
LOC663212	TcasGA2_TC008986	zinc finger protein 595	0.910436	-1.02805	0.924828	-1.03098	0.0006435	3.13841
LOC663216	TcasGA2_TC005338	alpha-crystallin A chain	0.480691	-2.10142	0.836659	1.22151	0.0004473	18.788
LOC663222	TcasGA2_TC003288	facilitated trehalose transporter Tret1	0.779674	1.90665	0.931506	-1.13158	0.001581	91.641
LOC663236	TcasGA2_TC009768	hemicentin-2	0	-5.80536	0.002263	-2.31162	7.486e-05	2.2777
LOC663240	TcasGA2_TC006793	protein lethal(2)essential for life	0.0260284	1.65627	0.820624	1.07972	0.0006259	3.41352
LOC663248	TcasGA2_TC007936	bifunctional lysine-specific demethylase and histidyl-hydroxylase NO66	0.159903	1.40312	0.7006	1.13749	0.006488	2.81774
LOC663249	TcasGA2_TC007420	alpha-N-acetylgalactosaminidase	0.827857	-1.03325	0.0956469	-1.54004	2.96e-09	3.92083
LOC663269	TcasGA2_TC014423	pre-rRNA-processing protein esf2	0.067459	1.38049	0.427498	1.22131	8.053e-06	2.8011
LOC663273	TcasGA2_TC008647	Hop	0.00104	1.67795	0.910557	-1.03293	0.003553	2.09537
LOC663284	TcasGA2_TC003169	leukocyte receptor cluster member 1 homolog	0.11083	1.3015	0.239063	1.40843	0.0004123	2.3821
LOC663285	TcasGA2_TC003487	uncharacterized LOC663285	0.806296	1.0423	0.860125	-1.04797	2.015e-07	3.17665
LOC663287	NA	thioredoxin	0.598006	1.23	0.313505	-1.58078	0.00638	3.70437
LOC663288	TcasGA2_TC007156	THO complex subunit 2	0.994936	-1.00088	0.641721	-1.12157	7.435e-08	3.02672
LOC663291	TcasGA2_TC013118	hsp90 co-chaperone Cdc37	0.855122	1.02537	0.841127	-1.05047	8.909e-06	2.47307
LOC663309	TcasGA2_TC008315	serine palmitoyltransferase 2	0.424515	-1.14651	0.742072	-1.09276	1.784e-15	7.49828
LOC663311	TcasGA2_TC014424	regulating synaptic membrane exocytosis protein 2	0.674635	3.06692	0.931128	-1.13789	0.004644	65.3989
LOC663321	TcasGA2_TC012717	titin	0.724869	-1.24906	1.516e-05	-6.14437	1.05e-14	29.3786
LOC663327	TcasGA2_TC002949	protein TFG	0.105684	1.26381	0.475657	-1.2091	1.159e-05	2.75454
LOC663336	TcasGA2_TC008912	AP-3 complex subunit sigma-2	0.0484223	1.68452	0.165388	-1.63629	0.0007966	3.52235
LOC663347	TcasGA2_TC003488	cyclin-dependent kinase 10	0.797205	-1.04607	0.0302803	-1.83089	0.001195	2.16225
LOC663370	TcasGA2_TC010174	Start1	8.64e-05	1.78314	0.387296	-1.24031	1.846e-06	2.77219
LOC663372	TcasGA2_TC009157	dystroglycan	1.72e-05	-1.95409	0.002717	-2.10897	6.767e-05	2.34593
LOC663383	TcasGA2_TC013377	exostosin-3	0.0648043	-1.34594	0.885555	-1.04089	0.0003981	2.17767
LOC663389	TcasGA2_TC011774	transcription initiation factor TFIID subunit 2	0.84064	-1.04018	0.731719	1.09775	0.0002078	2.58318
LOC663390	TcasGA2_TC032159	uncharacterized LOC663390	0.09282	-1.38561	0.278296	-1.35871	0.0001536	2.5116
LOC663411	TcasGA2_TC012615	rho GTPase-activating protein 21-B	3.03e-05	-1.81798	0.0962032	-1.53209	4.134e-06	2.52615
LOC663415	TcasGA2_TC002947	organic cation transporter protein	0.000895	-1.64442	0.885293	1.03317	3.595e-07	2.79918
LOC663433	TcasGA2_TC007813	protein lava lamp	0.00582	1.49347	0.538031	-1.1519	5.491e-09	3.28742
LOC663435	TcasGA2_TC008318	Arp11	0.224416	1.24523	0.108704	-1.53345	4.882e-08	3.60334
LOC663464	TcasGA2_TC001037	ras-like protein 1	0.877664	-1.02452	0.578378	1.16079	1.637e-05	2.58194
LOC663494	TcasGA2_TC014330	MOXD1 homolog 2	0.431319	-1.7414	0.131225	-8.16521	0.004827	7.51192
LOC663500	TcasGA2_TC005331	survival of motor neuron-related-splicing factor 30	0.824164	-1.03465	0.241881	-1.45042	0.0006345	2.44889
LOC663504	TcasGA2_TC000375	pre-mRNA-splicing factor Slu7	0.0474087	1.34966	0.80698	1.06542	0.001059	2.08653
LOC663522	TcasGA2_TC000537	glucosidase 2 subunit beta	0.481741	1.10495	0.396131	-1.20986	9.326e-05	2.20858
LOC663533	TcasGA2_TC014705	rho-associated protein kinase 1	0.0658554	1.29012	0.680597	1.10018	3.576e-05	2.30984
LOC663539	TcasGA2_TC000714	protein GDAP2 homolog	0.072979	-1.31377	0.863943	-1.04782	0.0003531	2.18595
LOC663540	TcasGA2_TC001039	ADAM 17-like protease	0.00184	1.6318	0.14702	1.49931	0.002035	2.22373
LOC663557	TcasGA2_TC000713	uncharacterized LOC663557	0.0766531	-1.32371	0.0659797	-1.66003	5.535e-07	3.29459
LOC663597	TcasGA2_TC003495	la-related protein 7	0.182955	1.21319	0.956788	-1.01505	2.22e-05	2.79548
LOC663599	TcasGA2_TC007407	tetratricopeptide repeat protein 5	0.185639	1.29611	0.125263	-1.50198	1.108e-10	4.45526
LOC663616	TcasGA2_TC008091	ubiquitin-like protein 3	0.0077	1.57181	0.272819	1.4612	0.006574	2.44871
LOC663618	TcasGA2_TC013457	XRN1	0.0855425	1.32994	0.301691	-1.34377	0.00356	2.08714
LOC663619	TcasGA2_TC014438	nucleoprotein TPR	0.144093	1.26247	0.818195	1.06923	0.0006397	2.32894
LOC663634	TcasGA2_TC008329	uncharacterized LOC663634	0.229659	-1.51286	0.0005896	-3.05533	7.959e-11	6.45844
LOC663675	TcasGA2_TC003497	putative inositol monophosphatase 3	0.582443	1.11557	0.403227	-1.25045	0.003587	2.04416
LOC663713	TcasGA2_TC007147	harmonin	0.0645722	-1.29228	0.438057	-1.20316	7.824e-05	2.21141
LOC663729	TcasGA2_TC009942	GLEAN_09943	0.80013	-1.04908	0.0517785	-1.73927	1.688e-08	3.7667
LOC663741	TcasGA2_TC007146	low-density lipoprotein receptor-related protein 4	0.697854	-1.28887	0.352627	-1.61871	9.237e-06	15.0531
LOC663742	TcasGA2_TC014445	MIB1	0.0293766	1.36551	0.404401	-1.23779	1.723e-05	2.59487
LOC663785	TcasGA2_TC007672	tyrosine-protein phosphatase 10D	0.413764	-1.13406	0.743269	-1.08043	2.937e-08	3.2465
LOC663788	TcasGA2_TC014455	ubiquitin carboxyl-terminal hydrolase CYLD	0.0420087	1.67483	0.324603	-1.37964	5.846e-05	3.77629
LOC663791	TcasGA2_TC009310	zinc transporter 2	0.191121	1.3429	0.0443149	-2.23493	0.003454	2.81478
LOC663806	TcasGA2_TC002932	mismatch repair endonuclease PMS2	0.190496	1.24519	0.92569	-1.02575	0.002332	2.12507
LOC663812	TcasGA2_TC008623	protein FAM50 homolog	0.0649666	1.39373	0.803901	-1.07046	3.047e-07	3.42375
LOC663817	TcasGA2_TC000868	Elb	0.139427	-2.42471	0.278161	-1.84697	0.001086	5.99675
LOC663829	TcasGA2_TC002931	alpha-tocopherol transfer protein-like	9.6e-06	3.50211	0.648671	-1.24928	0.0009289	5.24967
LOC663838	TcasGA2_TC000871	SP1070	0.000561	-1.97346	0.002427	-2.27106	2.231e-09	4.00905
LOC663845	TcasGA2_TC000689	drpr	0.158004	-1.24697	0.389886	-1.23388	3.327e-06	2.67531
LOC663859	TcasGA2_TC000872	regulator of nonsense transcripts 3A	0.0409994	1.40484	0.367177	1.28233	3.105e-05	2.92162
LOC663878	TcasGA2_TC013351	uncharacterized LOC663878	0.161389	-1.24309	0.404069	-1.23746	9.076e-09	3.67238
LOC663920	TcasGA2_TC008881	actin-related protein 6	0.0140294	1.47498	0.49494	1.19082	6.27e-08	3.50416
LOC663933	TcasGA2_TC009963	ubiquitin carboxyl-terminal hydrolase calypso	0.599784	1.08701	0.690741	-1.12435	0.004217	2.11773
LOC663944	TcasGA2_TC007396	putative neutral sphingomyelinase	0.662033	-1.08266	0.345694	-1.35392	0.003565	2.55003
LOC663951	TcasGA2_TC006413	sialin	1.11e-14	-6.83278	0.0849777	-1.63255	0.003044	2.08436
LOC663958	TcasGA2_TC007665	hypothetical protein	1	1	0.0270406	-491.849	0.003633	546.559
LOC663962	TcasGA2_TC010202	uncharacterized LOC663962	1.98e-06	-3.70958	0.509478	1.20321	0.004042	2.26688
LOC663967	TcasGA2_TC003517	snurportin-1	0.104042	-1.4637	0.0158547	-2.04173	0.0006598	2.24491
LOC664002	TcasGA2_TC003518	dual specificity protein phosphatase 22	0.830799	1.10548	0.162867	-2.64157	0.002368	5.61509
LOC664038	TcasGA2_TC006819	nucleoporin-like protein 2	0.884789	-1.04545	0.029563	-1.90035	7.368e-12	6.41368
LOC664045	TcasGA2_TC003521	polycomb protein Suz12	0.310202	-1.16155	0.823374	1.06387	0.0003515	2.37667
LOC664070	TcasGA2_TC005707	protein gustavus	1.2e-06	-1.99123	0.968583	1.01036	0.0001662	2.1769
LOC664076	TcasGA2_TC007124	charged multivesicular body protein 2a	0.146791	1.22319	0.0832941	-1.65772	0.001704	2.17172
LOC664081	TcasGA2_TC000514	dnaJ homolog subfamily C member 8	0.913543	1.02136	0.206394	-1.54166	2.387e-05	2.959
LOC664087	TcasGA2_TC006417	transcription factor hamlet	0.00854	23.0481	0.565422	-3.34716	0.002536	128.129
LOC664090	TcasGA2_TC001062	forkhead box protein O	0.00101	-2.12439	0.0004197	-3.35918	0.007402	2.00523
LOC664095	NA	tyrosine-protein kinase PR2	0.015566	1.45495	0.829689	1.05389	0.0007272	2.04018
LOC664103	TcasGA2_TC014736	protein asteroid	0.595842	1.10416	0.933063	-1.02544	1.477e-06	3.65769
LOC664105	TcasGA2_TC005701	ABC transporter G family member 14	2.51e-05	2.94281	0.248632	-1.67728	0.001366	2.51337
LOC664108	TcasGA2_TC003526	protein tilB homolog	0.146515	4.99284	0.804891	-1.42169	0.005354	17.0533
LOC664119	TcasGA2_TC007381	tumor necrosis factor receptor superfamily member wengen	0.239275	-3.28532	0.0436157	-11.8355	0.003463	9.71047
LOC664130	TcasGA2_TC008872	trifunctional enzyme subunit beta	0.0177433	1.40539	0.0156581	-1.88421	3.976e-05	2.4211
LOC664134	TcasGA2_TC003528	chitobiosyldiphosphodolichol beta-mannosyltransferase	0.263721	-1.21852	0.203737	-1.42418	8.735e-05	2.59013
LOC664135	TcasGA2_TC007535	CAP-D2	0.000377	-1.63643	0.333569	1.26531	1.93e-05	2.355
LOC664157	TcasGA2_TC013074	protein FAM13A	0.0216679	-1.43241	0.016822	-2.01218	5.786e-12	5.19326
LOC664198	TcasGA2_TC007531	CD151 antigen	0.165856	-1.38645	0.007895	-2.44703	0.002368	2.34604
LOC664216	TcasGA2_TC003537	uncharacterized LOC664216	0.0383132	-1.34448	0.81209	-1.06001	6.899e-09	3.34577
LOC664226	TcasGA2_TC014751	protein FAM122A	0.024621	1.4244	0.250253	1.35454	5.628e-05	2.63409
LOC664255	TcasGA2_TC002905	uncharacterized LOC664255	0.0316209	1.34442	0.523104	-1.15533	6.037e-07	2.68532
LOC664270	TcasGA2_TC007523	WD repeat-containing protein 19	0.409546	1.2055	0.761734	-1.09993	0.0003801	2.90918
LOC664276	TcasGA2_TC003541	protein lethal(2)essential for life	0.305504	1.7466	0.946339	1.02137	5.384e-14	25.8152
LOC664298	TcasGA2_TC007519	AT-rich interactive domain-containing protein 2	0.742681	-1.0461	0.488238	-1.17454	0.0002632	2.08945
LOC664325	TcasGA2_TC007360	AF4/FMR2 family member 4	0.509369	-1.09633	0.0666298	-1.57045	6.87e-07	2.77955
LOC664339	TcasGA2_TC003547	transmembrane and coiled-coil domains protein 2	7.63e-05	1.76899	0.79201	1.0622	3.834e-09	3.37768
LOC664359	TcasGA2_TC003550	sestrin homolog	0.287208	1.17272	0.0131888	-1.77431	1.711e-24	9.0793
LOC664381	TcasGA2_TC030729	pinin	0.119038	1.26003	0.768434	1.07835	0.000124	2.30302
LOC664383	TcasGA2_TC008151	low-density lipoprotein receptor-related protein 6	0.171418	1.21352	0.401716	1.23837	2.166e-06	2.75558
LOC664396	TcasGA2_TC008154	beta-1	0.035366	-1.53935	0.874902	-1.04076	3.479e-09	3.86774
LOC664397	TcasGA2_TC007345	protein bric-a-brac 1	0.0172357	1.88461	0.499449	-1.32336	0.0002641	4.30877
LOC664402	TcasGA2_TC033789	MAR-binding filament-like protein 1	0.000462	3.5679	0.384825	1.56379	0.007458	5.24363
LOC664407	TcasGA2_TC008830	ribosomal RNA processing protein 36 homolog	0.115521	1.2659	0.246589	-1.36379	6.472e-07	3.19778
LOC664411	TcasGA2_TC009998	eukaryotic initiation factor 4A-III	0.21595	1.18822	0.166585	1.40178	0.0007268	2.03674
LOC664413	TcasGA2_TC008829	splicing factor 3B subunit 2	0.115251	1.23401	0.162434	-1.37262	6.571e-06	2.41561
LOC664418	TcasGA2_TC008828	tetracycline resistance protein	0.943347	-1.0172	0.0004951	2.55063	0.00315	2.63299
LOC664433	TcasGA2_TC010003	DNA-directed RNA polymerases I	0.0961024	1.31313	0.801417	-1.07464	1.955e-05	2.87206
LOC664434	TcasGA2_TC010004	zinc finger SWIM domain-containing protein 4	0.893649	1.02328	0.041508	-1.64138	1.373e-11	4.35708
LOC664480	TcasGA2_TC008802	phosphorylated adapter RNA export protein	0.461184	-1.13737	0.993245	-1.00233	8.591e-05	2.48142
LOC664485	TcasGA2_TC008184	uncharacterized protein CG43867	0.0362146	1.48518	0.001808	-2.15657	4.57e-23	9.52811
LOC664486	TcasGA2_TC010029	phosphatidate phosphatase LPIN3	0.492068	-1.11144	0.160512	1.38439	1.186e-16	6.12106
LOC664496	TcasGA2_TC007305	anoctamin-1	0.965295	1.00781	0.679637	1.12147	1.737e-07	3.63837
LOC664499	TcasGA2_TC010033	pleckstrin homology domain-containing family F member 2	0.0267011	1.35015	0.916316	-1.02528	1.742e-06	2.62413
LOC664509	TcasGA2_TC030649	enolase-phosphatase E1	0.263512	1.17347	0.761929	-1.08121	8.336e-10	3.85325
LOC664510	TcasGA2_TC007298	mitogen-activated protein kinase kinase kinase 11	0.317529	1.16301	0.732513	-1.0924	0.0007762	2.11293
LOC664529	TcasGA2_TC010040	patj homolog	0.153037	1.29835	0.0400869	-1.95885	0.002744	2.29804
LOC664535	TcasGA2_TC007278	fasciculation and elongation protein zeta-2	0.0101424	-1.85032	0.242495	-1.43546	5.312e-06	3.54315
LOC664540	TcasGA2_TC010045	iron-sulfur cluster assembly scaffold protein IscU	0.354558	1.15353	0.537284	1.16606	4.29e-05	2.45613
LOC664547	TcasGA2_TC008216	hormone-sensitive lipase	0.00117	1.63478	0.890125	1.04003	0.004069	2.11532
LOC664550	TcasGA2_TC033817	uncharacterized LOC664550	0.701721	-1.23902	0.805205	1.11284	1.719e-05	11.4985
Tiotsh	TcasGA2_TC012322	Tc-tiotsh	0.5062	-1.58269	0.595354	1.86979	0.0001222	14.0392
Z9desB	TcasGA2_TC016415	GLEAN_16415	0.121988	-1.3505	8.871e-12	4.79572	2.492e-13	5.66934

## Sheet: Epifactor domains
		Comparisons	MD vs CD		MD vs CT		MD vs MT		Domains
Gene	Gene_Ids	Description	Pvalue	fold change	Pvalue	fold change	Pvalue	fold change
Kr-h1	TcasGA2_TC012990	Kruppel-homolog 1	0.0935542	-2.31128	0.896973	-1.11665	0.0162433	2.34068	Zinc finger, C2H2-like
LOC658154	TcasGA2_TC011641	alpha-2C adrenergic receptor	0.942618	-1.12011	0.118454	-3.42829	1.686e-06	44.8313	7 transmembrane receptor (rhodopsin family)
LOC656882	TcasGA2_TC016200	1-acyl-sn-glycerol-3-phosphate acyltransferase alpha	0.0611813	1.61195	0.0453241	-1.92055	1.814e-06	4.73349	Acetyltransferase
LOC657636	TcasGA2_TC003327	lysophosphatidylcholine acyltransferase	0.467418	1.82203	0.716919	1.14992	7.502e-07	38.7829	Acetyltransferase
LOC103314884	TcasGA2_TC011522	fatty acid synthase	0.399688	-1.12848	0.712049	1.08888	1.702e-26	10.1716	Acyl transferase domain
LOC656302	TcasGA2_TC002122	DNA-binding protein SMUBP-2	0.0881483	1.53833	0.0706894	-2.10019	0.001531	3.73631	AN1-like Zinc finger
LOC660861	TcasGA2_TC004637	WD repeat-containing protein 35	0.190292	-1.32688	0.115323	-1.61385	0.0002224	2.65516	ANAPC4_WD40
LOC656495	TcasGA2_TC000252	H6	0.0546499	-1.32898	0.816143	-1.05777	1.31e-05	2.47798	ARID/BRIGHT DNA binding domain
LOC664298	TcasGA2_TC007519	AT-rich interactive domain-containing protein 2	0.742681	-1.0461	0.488238	-1.17454	0.0002632	2.08945	ARID/BRIGHT DNA binding domain
LOC657345	TcasGA2_TC008719	retained	0.822559	1.03404	0.977837	-1.00693	6.451e-12	4.84365	ARID/BRIGHT DNA binding domain/jmjN domain/JmjC domain, hydroxylase
LOC660924	TcasGA2_TC002791	protein Jumonji	0.8469	1.02796	0.127323	-1.47454	0.00101	2.01748	ARID/BRIGHT DNA binding domain/jmjN domain/JmjC domain, hydroxylase
LOC660367	TcasGA2_TC008693	AT-rich interactive domain-containing protein 4B	0.0490635	1.32227	0.240975	-1.31113	1.018e-17	6.00466	ARID/BRIGHT DNA binding domain/RNA binding activity-knot of a chromodomain
LOC100142030	TcasGA2_TC008137	titin	0.660346	-1.06931	0.0138461	-1.8508	6.7e-13	4.91403	BAH domain
LOC662495	TcasGA2_TC012878	uncharacterized LOC662495	1.04e-08	2.28215	0.430586	-1.20106	1.585e-09	3.43531	Basic region leucine zipper
LOC107398888	TcasGA2_TC031589	zinc finger BED domain-containing protein 4-like	0.00666	2.18515	0.596018	-1.27515	0.002687	3.61851	BED zinc finger/hAT family C-terminal dimerisation region
LOC103312777	TcasGA2_TC008283	uncharacterized LOC103312777	0.254711	1.68959	0.347756	-1.82117	0.001171	8.31533	Broad-minded protein/ BROMI domain
LOC655905	TcasGA2_TC004983	ATPase family AAA domain-containing protein 2	0.000298	1.73152	0.546852	-1.1613	1.187e-12	4.93865	Bromodomain
LOC658493	TcasGA2_TC002507	transcription initiation factor TFIID subunit 1	0.0609276	1.30182	0.523427	-1.16113	1.566e-07	2.9738	Bromodomain/TATA box-binding protein binding
LOC661400	TcasGA2_TC004357	PH-interacting protein	0.259069	1.21039	0.409498	1.25825	3.242e-06	3.18455	Bromodomain/WD40
LOC100142011	TcasGA2_TC034251	kelch-like protein 38	0.0444655	1.54659	0.5279	-1.23895	0.007542	2.53559	BTB/POZ domain
LOC107398788	NA	centrosome-associated zinc finger protein CP190	0.00355	2.01914	0.103006	-1.96362	0.005061	2.81196	BTB/POZ domain
LOC656141	TcasGA2_TC001571	Gcl	0.823876	1.03429	0.857061	1.0437	4.92e-07	2.83503	BTB/POZ domain
LOC656203	TcasGA2_TC006318	BTB/POZ domain-containing protein KCTD5	0.597143	-1.09954	0.828511	1.06528	0.004869	2.06356	BTB/POZ domain
LOC664397	TcasGA2_TC007345	protein bric-a-brac 1	0.0172357	1.88461	0.499449	-1.32336	0.0002641	4.30877	BTB/POZ domain
LOC100141931	NA	zinc finger protein 271-like	0.0118514	1.53358	0.972795	1.01063	0.007045	2.17864	BTB/POZ domain/ zf-met
LOC655795	TcasGA2_TC011960	5-hydroxytryptamine receptor	1	-1.0045	0.510826	-1.48857	0.001576	7.02963	BTB/POZ domain/Centrosome-associated C terminus/EGF-like domain
LOC103315046	TcasGA2_TC004945	uncharacterized LOC103315046	3.03e-05	1.97332	0.0153048	-2.11526	2.561e-05	2.89046	bZIP transcription factor
LOC103313906	TcasGA2_TC005888	zinc finger protein 513	0.346841	1.403	0.664589	-1.22269	0.001977	4.83232	C2H2-type zinc-finger domain
LOC655187	TcasGA2_TC002688	D-2-hydroxyglutarate dehydrogenase	0.619974	1.23396	0.278959	-2.08527	0.008318	4.41299	CENP-B N-terminal DNA-binding domain
LOC662325	TcasGA2_TC000405	LDLR chaperone boca	0.572887	1.08665	0.92153	-1.02511	0.000916	2.03829	Chaperone for wingless signalling and trafficking of LDL receptor
LOC656073	TcasGA2_TC011371	chondroitin sulfate synthase 1	0.895601	1.04064	0.132007	-2.11481	0.00528	3.36193	Chondroitin N-acetylgalactosaminyltransferase
LOC661786	TcasGA2_TC004466	uncharacterized LOC661786	0.148701	1.26414	0.532374	1.18093	0.0009499	2.1841	Chromo shadow domain
LOC663012	TcasGA2_TC003481	negative elongation factor B	0.985546	-1.00294	0.670467	1.12872	0.002174	2.00601	Cofactor of BRCA1 (COBRA1)
LOC661686	TcasGA2_TC033431	nuclear speckle splicing regulatory protein 1	0.242013	1.21076	0.609923	-1.15925	8.334e-05	2.85647	Coiled-coil domain-containing protein 55 (DUF2040)
LOC660755	TcasGA2_TC004589	protein grainyhead	0.0425835	-1.33215	0.341896	-1.262	9.691e-08	3.08679	CP2 transcription factor
LOC658760	TcasGA2_TC010239	CYP6BK7	0.0244108	124.374	0.030862	-596.239	0.004746	660.69	Cytochrome P450
LOC103313624	TcasGA2_TC033693	probable ATP-dependent RNA helicase DDX43	0.140263	1.22421	0.351021	-1.23124	0.0001408	2.12974	DEAD/DEAH box helicase/helicase C
LOC656831	TcasGA2_TC001101	Ddx10	0.316358	1.15905	0.997871	-1.00097	0.001804	2.10926	DEAD/DEAH box helicase/helicase C
LOC658738	TcasGA2_TC009437	putative ATP-dependent RNA helicase DHX30	0.494085	1.11811	0.165972	-1.49747	0.002024	2.11715	DEAD/DEAH box helicase/helicase C
LOC658889	TcasGA2_TC005866	HFM1	0.046051	18.0391	0.415108	-5.58993	0.006139	86.8231	DEAD/DEAH box helicase/helicase C
LOC664411	TcasGA2_TC009998	eukaryotic initiation factor 4A-III	0.21595	1.18822	0.166585	1.40178	0.0007268	2.03674	DEAD/DEAH box helicase/helicase C
LOC664434	TcasGA2_TC010004	zinc finger SWIM domain-containing protein 4	0.893649	1.02328	0.041508	-1.64138	1.373e-11	4.35708	DEAD/DEAH box helicase/helicase C
LOC100142605	TcasGA2_TC003960	ankyrin-3	0.0230494	2.68536	0.28158	-1.93877	0.0005094	8.08106	Death domain
LOC656174	TcasGA2_TC003843	ankyrin-2	0.109213	-1.25418	0.0132545	-1.73404	3.899e-08	2.96073	Death domain
LOC658423	TcasGA2_TC013905	dnaJ protein homolog 1	2.97e-05	1.98903	0.0623508	1.60156	0.0001148	2.33957	DnaJ domain
LOC664081	TcasGA2_TC000514	dnaJ homolog subfamily C member 8	0.913543	1.02136	0.206394	-1.54166	2.387e-05	2.959	DnaJ domain
LOC659923	TcasGA2_TC015332	microprocessor complex subunit DGCR8	0.53709	1.12848	0.565878	-1.1921	0.0007592	2.52697	Double-stranded RNA binding motif
LOC660070	TcasGA2_TC011687	transcription factor E2F5	0.118005	1.24211	0.239449	-1.34673	8.979e-05	2.33196	E2F/DP family winged-helix DNA-binding domain
LOC663958	TcasGA2_TC007665	hypothetical protein	1	1	0.0270406	-491.849	0.003633	546.559	Ecdysteroid kinase
LOC659713	TcasGA2_TC007877	FAT	0.940975	-1.01126	0.0396485	-1.66589	1.856e-06	2.68092	EGF-like domain
LOC663838	TcasGA2_TC000871	SP1070	0.000561	-1.97346	0.002427	-2.27106	2.231e-09	4.00905	EGF-like domain
LOC662115	TcasGA2_TC007444	eukaryotic translation initiation factor 5B	0.88796	-1.01956	0.359961	-1.24044	1.901e-05	2.32839	Elongation factor Tu GTP binding domain
LOC664535	TcasGA2_TC007278	fasciculation and elongation protein zeta-2	0.0101424	-1.85032	0.242495	-1.43546	5.312e-06	3.54315	FEZ-like protein
LOC656499	TcasGA2_TC003407	Fz2	0.265658	-1.41566	0.001785	-3.1751	1.374e-06	4.4338	Fz domain
LOC662485	TcasGA2_TC009341	Fanconi anemia group M protein	0.0515706	1.37905	0.256259	1.36395	0.005842	2.02345	Helicase-C
LOC659723	TcasGA2_TC013301	transcriptional regulator ATRX homolog	0.0539789	1.33949	0.428463	1.21889	0.0003998	2.18381	Helicase-C/ SNF2_N
LOC100141983	TcasGA2_TC012658	uncharacterized LOC100141983	0.0349681	1.3999	0.681518	-1.11577	0.0002586	2.30674	Helix-loop-helix DNA-binding domain
LOC103312699	TcasGA2_TC003627	protein bric-a-brac 1-like	0.231244	-1.26051	0.0522913	-1.91919	0.0003061	3.08981	helix-turn-helix, Psq domain
LOC655012	TcasGA2_TC012462	mushroom body large-type Kenyon cell-specific protein 1	0.371268	-1.12903	0.745933	-1.07409	1.079e-05	2.36974	helix-turn-helix, Psq domain
LOC658500	TcasGA2_TC013944	histone deacetylase complex subunit SAP130	0.447481	1.11954	0.860478	-1.04408	4.089e-06	2.66645	Histone deacetylase complex subunit SAP130 C-terminus
LOC103314257	TcasGA2_TC012536	histone RNA hairpin-binding protein	0.944632	-1.01157	0.891564	-1.03481	0.000852	2.09952	Histone RNA hairpin-binding protein RNA-binding domain
LOC663806	TcasGA2_TC002932	mismatch repair endonuclease PMS2	0.190496	1.24519	0.92569	-1.02575	0.002332	2.12507	Histone-binding protein RBBP4 or subunit C of CAF1 complex/ WD40
LOC659892	TcasGA2_TC011550	DNA polymerase epsilon subunit C	0.632478	-1.08706	0.947791	1.02013	6.482e-06	2.92006	Histone-like transcription factor (CBF/NF-Y) and archaeal histone
LOC657074	TcasGA2_TC004698	lysine-specific demethylase 6A	0.0225932	-1.3909	0.0122395	-1.92383	8.506e-07	2.90642	JmjC domain, hydroxylase
LOC662182	TcasGA2_TC003186	JNK-interacting protein 3	0.0702307	1.28479	0.871701	-1.03821	3.085e-08	3.11727	JNK-interacting protein leucine zipper II
LOC661118	TcasGA2_TC012393	kelch-like protein 26	0.209644	1.22775	0.685192	-1.11104	0.0001197	2.40885	Kelch motif/ BTB/POZ domain
LOC100142586	TcasGA2_TC031474	kiinesin-12	0.0794307	21.1679	0.547104	-3.42619	0.003607	116.082	Kinesin motor domain
LOC664108	TcasGA2_TC003526	protein tilB homolog	0.146515	4.99284	0.804891	-1.42169	0.005354	17.0533	Leucine-rich repeat
LOC103313679	TcasGA2_TC004176	late histone H1	0.487065	-1.72287	0.001625	-33.5036	1.229e-05	14.4739	linker histone H1 and H5 family
LOC103314184	TcasGA2_TC034252	endothelial lipase-like	0.594448	1.42756	0.249929	-4.37312	0.004718	10.2577	Lipase
LOC103313681	TcasGA2_TC009918	uncharacterized LOC103313681	0.159442	1.30566	0.0177828	-1.979	1.821e-08	3.925	myb DNA binding
LOC100142007	TcasGA2_TC003611	Krueppel-like factor 6	0.00523	-1.85209	7.548e-06	-4.44421	9.293e-07	3.8186	NAD-specific glutamate dehydrogenase/Hsp70 protein
LOC663273	TcasGA2_TC008647	Hop	0.00104	1.67795	0.910557	-1.03293	0.003553	2.09537	NAD-specific glutamate dehydrogenase/Hsp70 protein
LOC656017	TcasGA2_TC014255	TcSRC	0.914765	1.0157	0.736843	-1.07851	2.432e-05	2.30875	PAS domain
LOC662676	TcasGA2_TC015502	potassium voltage-gated channel subfamily H member 6	0.742809	1.22911	0.396904	-2.05176	0.009922	7.60919	PAS domain
LOC657440	TcasGA2_TC001750	Dcr-1	0.623321	1.08992	0.923322	-1.02692	1.636e-05	2.81813	PAZ domain/helicase C
LOC658349	TcasGA2_TC007761	SH3 and multiple ankyrin repeat domains protein 3	2.62e-13	-2.81843	0.114716	-1.45549	0.0001043	2.21321	PDZ domain (Also known as DHR or GLGF)
LOC664255	TcasGA2_TC002905	uncharacterized LOC664255	0.0316209	1.34442	0.523104	-1.15533	6.037e-07	2.68532	PDZ domain (Also known as DHR or GLGF)/SAM-1
LOC664480	TcasGA2_TC008802	phosphorylated adapter RNA export protein	0.461184	-1.13737	0.993245	-1.00233	8.591e-05	2.48142	PHAX RNA-binding domain
LOC658443	TcasGA2_TC033642	uncharacterized LOC658443	0.181766	5.63315	0.336518	-3.83748	0.003056	66.7494	PHD domain
LOC659240	TcasGA2_TC013912	polycomb protein Asx	0.235719	1.47465	0.0911326	-1.82303	7.392e-07	6.43221	PHD domain of transcriptional enhancer, Asx
LOC658776	TcasGA2_TC000606	histone-lysine N-methyltransferase 2C	0.195343	1.19966	0.892845	-1.03058	2.184e-12	4.12808	PHD-like zinc-binding domain or zf-HC5HC2H_2
LOC655547	TcasGA2_TC012067	cyclin-G-associated kinase	0.142628	1.38538	0.535614	-1.23525	0.005823	2.6257	pkinase
LOC656565	TcasGA2_TC002522	tyrosine-protein kinase Src64B	0.809375	-1.05576	0.243793	-1.42277	0.0006734	2.5787	pkinase
LOC657585	TcasGA2_TC009790	tyrosine-protein kinase Src42A	0.746847	1.04575	0.93417	-1.02205	4.695e-06	2.92782	pkinase
LOC658197	TcasGA2_TC007481	serine/threonine-protein kinase SIK2	0.361239	1.6184	0.2624	-2.11215	0.0009318	7.01689	pkinase
LOC658616	TcasGA2_TC000021	ribosomal protein S6 kinase alpha-5	0.269705	1.18644	0.153664	-1.49479	8.965e-05	2.35156	Pkinase
LOC658754	TcasGA2_TC010495	MAP kinase-interacting serine/threonine-protein kinase 1	1.01e-05	1.87526	0.529561	-1.1667	5.673e-13	4.69424	Pkinase
LOC659260	TcasGA2_TC006474	thickveins	0.564432	-1.09549	0.0642871	-1.63846	0.000702	2.12605	pkinase
LOC659444	TcasGA2_TC000228	myosin light chain kinase	0.603707	1.36221	0.257921	1.812	0.007622	6.92001	Pkinase
LOC660568	TcasGA2_TC000132	protein sel-5	0.0266309	1.38909	0.50345	-1.19506	0.0001249	2.42431	Pkinase
LOC661026	TcasGA2_TC002107	calcium/calmodulin-dependent protein kinase kinase 2	0.00766	-2.03269	0.002431	-3.6065	0.009474	2.20061	pkinase
LOC661123	TcasGA2_TC010386	SNF-related serine/threonine-protein kinase	0.0239519	-1.63715	0.406995	-1.2798	3.12e-05	2.8356	pkinase
LOC661365	TcasGA2_TC003645	mitogen-activated protein kinase kinase kinase 13	0.802414	1.05005	0.516008	-1.24303	0.001411	2.9393	Pkinase
LOC661839	TcasGA2_TC014143	protein kinase DC2	0.376702	1.28243	0.966357	1.01448	0.00295	3.17674	pkinase
LOC662493	TcasGA2_TC012166	Stk11	0.222556	1.3128	0.483751	1.22534	9.977e-05	3.07032	pkinase
LOC663347	TcasGA2_TC003488	cyclin-dependent kinase 10	0.797205	-1.04607	0.0302803	-1.83089	0.001195	2.16225	Pkinase
LOC663533	TcasGA2_TC014705	rho-associated protein kinase 1	0.0658554	1.29012	0.680597	1.10018	3.576e-05	2.30984	pkinase
LOC664095	NA	tyrosine-protein kinase PR2	0.015566	1.45495	0.829689	1.05389	0.0007272	2.04018	pkinase
LOC664510	TcasGA2_TC007298	mitogen-activated protein kinase kinase kinase 11	0.317529	1.16301	0.732513	-1.0924	0.0007762	2.11293	pkinase
LOC656919	TcasGA2_TC003063	kalirin	0.864178	1.0242	0.0516421	-1.55368	4.531e-11	3.77003	Pkinase/SET-domain
LOC660815	TcasGA2_TC003352	tyrosine-protein kinase-like otk	0.514835	-1.29512	0.171868	-1.75246	0.000494	4.75392	Pkinase/SET-domain
LOC662729	TcasGA2_TC002962	titin	0.0121306	1.52491	0.64863	1.11323	6.14e-13	5.01686	Pkinase/SET-domain
LOC655103	TcasGA2_TC000263	epithelial discoidin domain-containing receptor 1	0.909757	1.20129	0.272072	-5.18295	0.00434	23.8876	Pkinase_Tyr
LOC659567	TcasGA2_TC001238	sev	0.629276	-1.25456	0.0107944	-4.13714	2.056e-05	7.2248	Pkinase_Tyr
LOC657382	TcasGA2_TC001579	discoidin domain-containing receptor 2	0.0740334	1.62524	0.001137	-2.58097	1.609e-27	14.3991	Pkinase-tyr
LOC100141810	TcasGA2_TC008959	hypothetical protein	0.0656782	1.34244	0.994588	1.00185	4.959e-06	2.81735	RFX DNA-binding domain
LOC663597	TcasGA2_TC003495	la-related protein 7	0.182955	1.21319	0.956788	-1.01505	2.22e-05	2.79548	RNA binding motif/RRM_1
LOC656593	TcasGA2_TC007648	RNA-binding protein 42	0.140897	1.27446	0.967841	1.01225	0.006718	2.03124	RRM-1 (RNA recognition motif)
LOC658730	TcasGA2_TC014625	RNA-binding protein 45	0.135256	1.30982	0.493107	-1.22722	3.57e-07	3.69144	RRM-1 (RNA recognition motif)
LOC659353	TcasGA2_TC004378	cleavage stimulation factor subunit 2 tau variant	0.247931	-1.2808	0.969369	-1.01158	0.005363	2.11782	RRM-1 (RNA recognition motif)
LOC661278	TcasGA2_TC006356	protein split ends	0.149311	-1.23117	0.210086	-1.35368	3.562e-14	5.13732	RRM-1 (RNA recognition motif)
LOC662308	TcasGA2_TC009171	probable splicing factor	0.776608	1.04817	0.909462	-1.03284	9.831e-07	3.32727	RRM-1 (RNA recognition motif)
LOC655591	TcasGA2_TC003752	ph	0.408759	1.18779	0.0755894	-1.73338	0.0001587	2.90836	SAM_1
LOC657588	TcasGA2_TC005663	ankyrin repeat and SAM domain-containing protein 4B	0.0991927	1.3742	0.591076	-1.18198	0.0002029	2.9567	SAM_1
LOC658901	TcasGA2_TC012916	liprin-alpha-1	0.0425306	1.3486	0.0892657	-1.52479	3.325e-06	2.73126	SAM_1
LOC659984	TcasGA2_TC014507	ETS-like protein pointed	0.0220269	-1.47311	0.012308	-1.95277	5.139e-06	2.70621	SAM_1
LOC655427	TcasGA2_TC002774	robo	0.495469	1.27409	0.179324	-1.98321	0.005607	3.7053	SET domain
LOC658843	TcasGA2_TC004768	trithorax	0.44995	1.13484	0.085884	-1.64322	1.205e-06	3.4093	SET domain
LOC657811	TcasGA2_TC015826	histone-lysine N-methyltransferase SETD1B	0.0252515	1.37317	0.530614	-1.16648	5.152e-08	3.17563	SET domain/RRM-1
LOC100142209	TcasGA2_TC012344	protein sidekick	0.367289	-1.1379	0.001322	-2.15452	1.494e-08	3.23982	SET-domain
LOC654915	TcasGA2_TC002636	neural cell adhesion molecule 2	0.29984	-1.2028	0.0690322	-1.59389	1.017e-06	2.89245	SET-domain
LOC660533	TcasGA2_TC003987	titin	8.92e-08	-2.19719	3.324e-06	-3.05277	2.804e-16	5.45711	SET-domain
LOC658831	TcasGA2_TC004111	putative DNA helicase Ino80	0.601965	-1.0836	0.0981117	-1.48015	2.428e-10	3.81909	SNF2_N
LOC103312414	TcasGA2_TC003791	transcription factor Sox-10	0.821275	1.15128	0.174447	-2.5557	0.0001424	12.0187	Sox developmental protein N terminal
LOC660271	TcasGA2_TC006901	protein SPT2 homolog	0.0343918	1.38772	0.621498	-1.12963	1.448e-11	4.28669	SPT2 chromatin protein
LOC661420	TcasGA2_TC013511	H15	0.830467	1.07403	0.192568	-1.64422	0.001413	3.49177	T-box
LOC103314831	TcasGA2_TC001557	uncharacterized LOC103314831	0.271276	-1.30233	0.0790644	-1.63761	0.0005213	2.42285	Transcription factor IIIC subunit delta N-term
LOC658430	TcasGA2_TC014624	death-inducer obliterator 1	0.562489	1.08167	0.478811	-1.18431	0.0006075	2.00299	Transcription factor S-II (TFIIS), central domain
LOC658025	TcasGA2_TC003128	serine/threonine-protein kinase SMG1	0.969951	-1.00534	0.345361	-1.26324	1.875e-05	2.52462	transmembrane receptor
LOC660584	TcasGA2_TC000987	uncharacterized LOC660584	0.0496691	1.3465	0.276252	-1.35567	0.0003561	2.25566	Tudor domain
LOC662238	TcasGA2_TC006774	tudor and KH domain-containing protein	0.277295	1.19316	0.396801	-1.2579	0.001383	2.12543	Tudor domain
LOC660417	TcasGA2_TC014516	spn-E	0.00282	1.54366	0.850334	-1.04829	1.831e-06	2.70293	Tudor domain/helicase C
LOC663037	TcasGA2_TC007573	ubiquitin carboxyl-terminal hydrolase 46	0.0716342	1.39741	0.182881	1.43796	0.0005277	2.54224	UCH_1/Ubiquitin carboxyl-terminal hydrolase
LOC656756	TcasGA2_TC007647	DDB1- and CUL4-associated factor 8	0.0111298	1.43626	0.440583	-1.20211	0.000148	2.201	WD40
LOC660295	TcasGA2_TC013522	protein FAN	0.00373	1.71551	0.517336	1.2103	0.001828	2.33278	WD40
LOC661456	TcasGA2_TC003254	intraflagellar transport protein 122 homolog	0.243184	1.20636	0.355941	1.29313	0.001839	2.16474	WD40
LOC661803	TcasGA2_TC009902	nucleoporin SEH1	0.265179	-1.24014	0.66961	-1.12048	0.001731	2.14196	WD40
LOC663146	TcasGA2_TC007807	cilia- and flagella-associated protein 44	0.369179	1.13491	0.14213	-1.54025	0.001474	2.02937	WD40
LOC664270	TcasGA2_TC007523	WD repeat-containing protein 19	0.409546	1.2055	0.761734	-1.09993	0.0003801	2.90918	WD40
LOC661936	TcasGA2_TC010155	Wnt7	0.875033	-1.30456	0.241887	-3.74517	0.002631	31.1353	wnt family
LOC103313905	TcasGA2_TC009222	zinc finger protein 883	0.34923	1.27029	0.919909	1.03424	0.007162	2.7799	Zinc finger, C2H2 type
LOC663212	TcasGA2_TC008986	zinc finger protein 595	0.910436	-1.02805	0.924828	-1.03098	0.0006435	3.13841	Zinc finger, C2H2 type/ zf-C2H2
LOC103313193	TcasGA2_TC002118	Krueppel-like factor 6	0.000338	-1.97256	1.13e-06	-3.93699	6.264e-07	3.09762	Zinc finger, C2H2-like
LOC656299	TcasGA2_TC001921	lethal(3)malignant brain tumor-like protein 4	0.015577	1.41081	0.491166	1.18745	0.00108	2.01764	Zinc finger, C2HC type/ Sam-1
LOC103313725	TcasGA2_TC030677	E3 ubiquitin-protein ligase Topors	0.00128	1.63073	0.430528	1.21586	0.0008014	2.0681	Zinc finger, C3HC4 type (RING finger)
LOC663742	TcasGA2_TC014445	MIB1	0.0293766	1.36551	0.404401	-1.23779	1.723e-05	2.59487	Zinc finger, C3HC4 type (RING finger)
LOC100142491	TcasGA2_TC013145	Hr38	1.2e-12	-3.94281	0.0001686	-2.62181	4.679e-10	3.78245	Zinc finger, C4 type
LOC655884	TcasGA2_TC001722	Svp	0.827625	-1.06073	0.0544063	-1.88664	2.455e-05	3.57852	Zinc finger, C4 type (two domains)
LOC658929	TcasGA2_TC002548	NR5A3	0.400377	1.13278	0.0660439	-1.66027	4.438e-05	2.63395	Zinc finger, C4 type (two domains)
LOC660431	TcasGA2_TC009106	synaptic vesicle membrane protein VAT-1 homolog-like	3.28e-06	-2.0981	0.825088	1.06486	0.001401	2.17779	Zinc-binding dehydrogenase
LOC662742	TcasGA2_TC009849	zinc finger protein 260	0.0212947	1.45493	0.805136	-1.07483	0.0009032	2.27483	Zinc-finger associated domain (zf-AD)/zf-C2H2
LOC103312988	TcasGA2_TC013698	zinc finger protein 665	0.453605	-1.25765	0.0823338	-1.9692	0.003686	3.07979	Zinc-finger associated domain (zf-AD)/zf-C2H2_4
LOC656305	TcasGA2_TC016272	zinc finger matrin-type protein 2	0.0308312	1.39989	0.518072	-1.19988	2.015e-08	3.98809	Zinc-finger double-stranded RNA-binding
Tiotsh	TcasGA2_TC012322	Tc-tiotsh	0.5062	-1.58269	0.595354	1.86979	0.0001222	14.0392	zinc-finger of a C2HC-type

## Sheet: MET_SRC_expression
		Comparisons	MD vs CD		MD vs CT		MD vs MT
Gene	Gene_Ids	Description	Pvalue	fold change	Pvalue	fold change	Pvalue	fold change
Tcmet	TcasGA2_TC003908, Met	methoprene-tolerant	0.367195	1.1772	0.548939	1.20287	0.839668	-1.07024
LOC656017	TcasGA2_TC014255	TcSRC	0.914765	1.0157	0.736843	-1.07851	2.432e-05	2.30875
